# Supplementary material for: Tracking invasion events: phylogeography of Hyalomma marginatum in the Mediterranean basin with a focus on Southern France
Source: Research Square preprint supplement (doi:10.21203/rs.3.rs-5952236/v1), 2025-04-21
Supplement: Supplementary file 1 [file 25e8367e5bccdbb1b3ce18f7.xlsx]

## Sheet: Feuil1
Gene	Ns	S	h	k	Hd	π	D	Fs
12S rRNA	699	11	12	0.188	0.184	0.0012	-1.84	-16.86
COI	699	45	57	1.584	0.673	0.0025	-2.005	-26.66
Concatenated	699	55	68	1.755	0.698	0.0022	-2.111	-26.78
