# Supplementary material for: Tracking invasion events: phylogeography of Hyalomma marginatum in the Mediterranean basin with a focus on Southern France
Source: Research Square preprint supplement (doi:10.21203/rs.3.rs-5952236/v1), 2025-04-21
Supplement: Supplementary file 2 [file 41c3e750dd83883fff90cd2e.xlsx]

## Sheet: Feuil1
Name of the sequence	Country	Region / department	Locality	Year	Host	Stade	Species	Haplotype	Cluster assignation	Genbank number assignation 12S	Genbank number assignation COI
012_FR30_141-1_17_EQU_M	France	Gard	Pompignan	2017	Equus caballus	Male	H. marginatum	Hap_47	3	PV051478	PV019529
013_FR30_141-1_17_EQU_M	France	Gard	Pompignan	2017	Equus caballus	Male	H. marginatum	Hap_47	3	PV051479	PV019530
056_FR34_AF02_18_EQU_F	France	Hérault	Claret	2018	Equus caballus	Female	H. marginatum	Hap_45	3	PV051480	PV019531
057_FR34_AF02_18_EQU_F	France	Hérault	Claret	2018	Equus caballus	Female	H. marginatum	Hap_47	3	PV051481	PV019532
059_FR13_J_18_EQU_M	France	Bouches-du-Rhône	Miramas-le-Vieux	2018	Equus caballus	Male	H. marginatum	Hap_5	1	PV051482	PV019533
064_FR34_AF01_18_EQU_M	France	Hérault	Claret	2018	Equus caballus	Male	H. marginatum	Hap_47	3	PV051483	PV019534
065_FR34_AF01_18_EQU_M	France	Hérault	Claret	2018	Equus caballus	Male	H. marginatum	Hap_47	3	PV051484	PV019535
068_FR34_AF01_18_EQU_M	France	Hérault	Claret	2018	Equus caballus	Male	H. marginatum	Hap_47	3	PV051485	PV019536
069_FR34_AF01_18_EQU_M	France	Hérault	Claret	2018	Equus caballus	Male	H. marginatum	Hap_47	3	PV051486	PV019537
079_FR34_AD01_18_EQU_F	France	Hérault	Bessan	2018	Equus caballus	Female	H. marginatum	Hap_47	3	PV051487	PV019538
087_FR83_K_17_EQU_M	France	Var	Gassin	2017	Equus caballus	Male	H. marginatum	Hap_17	1	PV051488	PV019539
088_FR83_K_17_EQU_M	France	Var	Gassin	2017	Equus caballus	Male	H. marginatum	Hap_19	2	PV051489	PV019540
089_FR83_P2_17_EQU_F	France	Var	La Londe les Maures	2017	Equus caballus	Female	H. marginatum	Hap_19	2	PV051490	PV019541
090_FR83_P2_17_EQU_F	France	Var	La Londe les Maures	2017	Equus caballus	Female	H. marginatum	Hap_19	2	PV051491	PV019542
096_FR34_B1_17_EQU_M	France	Hérault	Pompignan	2017	Equus caballus	Male	H. marginatum	Hap_47	3	PV051492	PV019543
097_FR34_B1_17_EQU_M	France	Hérault	Pompignan	2017	Equus caballus	Male	H. marginatum	Hap_47	3	PV051493	PV019544
103_FR34_H1_17_EQU_M	France	Hérault	Notre Dame de Londres	2017	Equus caballus	Male	H. marginatum	Hap_47	3	PV051494	PV019545
105_FR83_J1_17_EQU_M	France	Var	la Môle	2017	Equus caballus	Male	H. marginatum	Hap_19	2	PV051495	PV019546
106_FR83_J1_17_EQU_M	France	Var	la Môle	2017	Equus caballus	Male	H. marginatum	Hap_19	2	PV051496	PV019547
112_FR83_I2_17_EQU_F	France	Var	Le Luc	2017	Equus caballus	Female	H. marginatum	Hap_47	3	PV051497	PV019548
113_FR83_I2_17_EQU_F	France	Var	Le Luc	2017	Equus caballus	Female	H. marginatum	Hap_47	3	PV051498	PV019549
118_FR83_I2_17_EQU_F	France	Var	Le Luc	2017	Equus caballus	Female	H. marginatum	Hap_5	1	PV051499	PV019550
128_FR83_L_17_EQU_F	France	Var	Pujet sur Argens	2017	Equus caballus	Female	H. marginatum	Hap_19	2	PV051500	PV019551
137_FR83_O2_17_EQU_F	France	Var	Bormes les Mimosas	2017	Equus caballus	Female	H. marginatum	Hap_19	2	PV051501	PV019552
138_FR83_O2_17_EQU_F	France	Var	Bormes les Mimosas	2017	Equus caballus	Female	H. marginatum	Hap_19	2	PV051502	PV019553
146_FR34_E2_17_EQU_M	France	Hérault	Lauret	2017	Equus caballus	Male	H. marginatum	Hap_47	3	PV051503	PV019554
147_FR34_E2_17_EQU_M	France	Hérault	Lauret	2017	Equus caballus	Male	H. marginatum	Hap_47	3	PV051504	PV019555
156_FR83_O1_17_EQU_M	France	Var	Bormes les Mimosas	2017	Equus caballus	Male	H. marginatum	Hap_19	2	PV051505	PV019556
157_FR83_O1_17_EQU_M	France	Var	Bormes les Mimosas	2017	Equus caballus	Male	H. marginatum	Hap_47	3	PV051506	PV019557
161_FR83_I1_17_EQU_M	France	Var	Le Luc	2017	Equus caballus	Male	H. marginatum	Hap_5	1	PV051507	PV019558
162_FR83_I1_17_EQU_M	France	Var	Le Luc	2017	Equus caballus	Male	H. marginatum	Hap_5	1	PV051508	PV019559
172_FR34_B2_17_EQU_F	France	Hérault	Pompignan	2017	Equus caballus	Female	H. marginatum	Hap_47	3	PV051509	PV019560
173_FR34_B2_17_EQU_F	France	Hérault	Pompignan	2017	Equus caballus	Female	H. marginatum	Hap_17	1	PV051510	PV019561
176_FR83_P1_17_EQU_M	France	Var	La Londe les Maures	2017	Equus caballus	Male	H. marginatum	Hap_19	2	PV051511	PV019562
177_FR83_P1_17_EQU_M	France	Var	La Londe les Maures	2017	Equus caballus	Male	H. marginatum	Hap_19	2	PV051512	PV019563
179_FR83_J2_17_EQU_F	France	Var	la Môle	2017	Equus caballus	Female	H. marginatum	Hap_45	3	PV051513	PV019564
180_FR83_J2_17_EQU_F	France	Var	la Môle	2017	Equus caballus	Female	H. marginatum	Hap_19	2	PV051514	PV019565
184_FR34_E1_17_EQU_F	France	Hérault	Lauret	2017	Equus caballus	Female	H. marginatum	Hap_47	3	PV051515	PV019566
185_FR34_E1_17_EQU_F	France	Hérault	Lauret	2017	Equus caballus	Female	H. marginatum	Hap_47	3	PV051516	PV019567
193_FR34_G1_17_EQU_M	France	Hérault	Cazilhac	2017	Equus caballus	Male	H. marginatum	Hap_47	3	PV051517	PV019568
197_FR34_F3_17_EQU_F	France	Hérault	Notre Dame de Londres	2017	Equus caballus	Female	H. marginatum	Hap_17	1	PV051518	PV019569
205_FR34_F5_17_EQU_M	France	Hérault	Notre Dame de Londres	2017	Equus caballus	Male	H. marginatum	Hap_47	3	PV051519	PV019570
206_FR34_F5_17_EQU_M	France	Hérault	Notre Dame de Londres	2017	Equus caballus	Male	H. marginatum	Hap_47	3	PV051520	PV019571
211_FR34_F1_17_EQU_F	France	Hérault	Notre Dame de Londres	2017	Equus caballus	Female	H. marginatum	Hap_47	3	PV051521	PV019572
212_FR34_F1_17_EQU_F	France	Hérault	Notre Dame de Londres	2017	Equus caballus	Female	H. marginatum	Hap_47	3	PV051522	PV019573
216_FR34_J1_17_EQU_F	France	Hérault	Bréau et Salagosse	2017	Equus caballus	Female	H. marginatum	Hap_47	3	PV051523	PV019574
217_FR34_L1_17_EQU_M	France	Hérault	Saint Maurice de Navacelles	2017	Equus caballus	Male	H. marginatum	Hap_57	3	PV051524	PV019575
230_FR66_Q5_17_EQU_M	France	Pyrénées-Orientales	Caudiès de Fenouillèdes	2017	Equus caballus	Male	H. marginatum	Hap_4	1	PV051525	PV019576
231_FR66_Q5_17_EQU_M	France	Pyrénées-Orientales	Caudiès de Fenouillèdes	2017	Equus caballus	Male	H. marginatum	Hap_4	1	PV051526	PV019577
232_FR66_Q5_17_EQU_M	France	Pyrénées-Orientales	Caudiès de Fenouillèdes	2017	Equus caballus	Male	H. marginatum	Hap_47	3	PV051527	PV019578
239_FR66_Q3_17_EQU_F	France	Pyrénées-Orientales	Caudiès de Fenouillèdes	2017	Equus caballus	Female	H. marginatum	Hap_47	3	PV051528	PV019579
240_FR66_Q3_17_EQU_F	France	Pyrénées-Orientales	Caudiès de Fenouillèdes	2017	Equus caballus	Female	H. marginatum	Hap_4	1	PV051529	PV019580
242_FR66_I1_17_EQU_M	France	Pyrénées-Orientales	Saint-Génis-des-Fontaines	2017	Equus caballus	Male	H. marginatum	Hap_47	3	PV051530	PV019581
243_FR66_I1_17_EQU_M	France	Pyrénées-Orientales	Saint-Génis-des-Fontaines	2017	Equus caballus	Male	H. marginatum	Hap_47	3	PV051531	PV019582
244_FR66_I1_17_EQU_M	France	Pyrénées-Orientales	Saint-Génis-des-Fontaines	2017	Equus caballus	Male	H. marginatum	Hap_47	3	PV051532	PV019583
245_FR66_F2_17_EQU_F	France	Pyrénées-Orientales	Montalba-le-Château	2017	Equus caballus	Female	H. marginatum	Hap_17	1	PV051533	PV019584
246_FR66_F1_17_EQU_M	France	Pyrénées-Orientales	Montalba-le-Château	2017	Equus caballus	Male	H. marginatum	Hap_17	1	PV051534	PV019585
247_FR66_F1_17_EQU_M	France	Pyrénées-Orientales	Montalba-le-Château	2017	Equus caballus	Male	H. marginatum	Hap_17	1	PV051535	PV019586
248_FR66_H2_17_EQU_M	France	Pyrénées-Orientales	Prades	2017	Equus caballus	Male	H. marginatum	Hap_17	1	PV051536	PV019587
249_FR66_H2_17_EQU_M	France	Pyrénées-Orientales	Prades	2017	Equus caballus	Male	H. marginatum	Hap_17	1	PV051537	PV019588
250_FR66_J4_17_EQU_M	France	Pyrénées-Orientales	Montesquieu les Albères	2017	Equus caballus	Male	H. marginatum	Hap_47	3	PV051538	PV019589
251_FR66_D1_17_EQU_M	France	Pyrénées-Orientales	Sainte Colombe de la Commanderie	2017	Equus caballus	Male	H. marginatum	Hap_17	1	PV051539	PV019590
252_FR66_D1_17_EQU_M	France	Pyrénées-Orientales	Sainte Colombe de la Commanderie	2017	Equus caballus	Male	H. marginatum	Hap_17	1	PV051540	PV019591
253_FR66_A1_17_EQU_M	France	Pyrénées-Orientales	Sainte Colombe de la Commanderie	2017	Equus caballus	Male	H. marginatum	Hap_11	1	PV051541	PV019592
254_FR66_G2_17_EQU_M	France	Pyrénées-Orientales	Montalba-le-Château	2017	Equus caballus	Male	H. marginatum	Hap_17	1	PV051542	PV019593
255_FR66_G2_17_EQU_M	France	Pyrénées-Orientales	Montalba-le-Château	2017	Equus caballus	Male	H. marginatum	Hap_11	1	PV051543	PV019594
256_FR66_H1_17_EQU_M	France	Pyrénées-Orientales	Prades	2017	Equus caballus	Male	H. marginatum	Hap_17	1	PV051544	PV019595
258_FR66_M1_17_EQU_M	France	Pyrénées-Orientales	Bages	2017	Equus caballus	Male	H. marginatum	Hap_11	1	PV051545	PV019596
259_FR66_M1_17_EQU_M	France	Pyrénées-Orientales	Bages	2017	Equus caballus	Male	H. marginatum	Hap_20	2	PV051546	PV019597
260_FR66_M1_17_EQU_M	France	Pyrénées-Orientales	Bages	2017	Equus caballus	Male	H. marginatum	Hap_47	3	PV051547	PV019598
261_FR66_M2_17_EQU_F	France	Pyrénées-Orientales	Bages	2017	Equus caballus	Female	H. marginatum	Hap_17	1	PV051548	PV019599
262_FR66_E2_17_EQU_F	France	Pyrénées-Orientales	Sournia	2017	Equus caballus	Female	H. marginatum	Hap_4	1	PV051549	PV019600
263_FR66_E2_17_EQU_M	France	Pyrénées-Orientales	Sournia	2017	Equus caballus	Male	H. marginatum	Hap_47	3	PV051550	PV019601
266_FR66_E2_17_EQU_M	France	Pyrénées-Orientales	Sournia	2017	Equus caballus	Male	H. marginatum	Hap_4	1	PV051551	PV019602
275_FR66_E2_17_EQU_M	France	Pyrénées-Orientales	Sournia	2017	Equus caballus	Male	H. marginatum	Hap_4	1	PV051552	PV019603
280_FR66_G1_17_EQU_F	France	Pyrénées-Orientales	Montalba-le-Château	2017	Equus caballus	Female	H. marginatum	Hap_47	3	PV051553	PV019604
281_FR66_G1_17_EQU_F	France	Pyrénées-Orientales	Montalba-le-Château	2017	Equus caballus	Female	H. marginatum	Hap_17	1	PV051554	PV019605
294_FR66_E1_17_EQU_F	France	Pyrénées-Orientales	Sournia	2017	Equus caballus	Female	H. marginatum	Hap_47	3	PV051555	PV019606
304_FR66_J2_17_EQU_M	France	Pyrénées-Orientales	Montesquieu les Albères	2017	Equus caballus	Male	H. marginatum	Hap_47	3	PV051556	PV019607
307_FR66_J1_17_EQU_F	France	Pyrénées-Orientales	Montesquieu les Albères	2017	Equus caballus	Female	H. marginatum	Hap_20	2	PV051557	PV019608
308_FR66_J1_17_EQU_F	France	Pyrénées-Orientales	Montesquieu les Albères	2017	Equus caballus	Female	H. marginatum	Hap_47	3	PV051558	PV019609
313_FR83_E1_17_EQU_M	France	Var	Vidauban	2017	Equus caballus	Male	H. marginatum	Hap_47	3	PV051559	PV019610
314_FR83_E1_17_EQU_M	France	Var	Vidauban	2017	Equus caballus	Male	H. marginatum	Hap_47	3	PV051560	PV019611
316_FR11_A17_17_EQU_M	France	Aude	Termes	2017	Equus caballus	Male	H. marginatum	Hap_47	3	PV051561	PV019612
341_FR11_H1_17_EQU_F	France	Aude	Leuc	2017	Equus caballus	Female	H. marginatum	Hap_17	1	PV051562	PV019613
342_FR11_A1_17_EQU_M	France	Aude	Termes	2017	Equus caballus	Male	H. marginatum	Hap_47	3	PV051563	PV019614
343_FR11_A1_17_EQU_M	France	Aude	Termes	2017	Equus caballus	Male	H. marginatum	Hap_17	1	PV051564	PV019615
383_FR83_E2_17_EQU_F	France	Var	Vidauban	2017	Equus caballus	Female	H. marginatum	Hap_19	2	PV051565	PV019616
384_FR83_E2_17_EQU_F	France	Var	Vidauban	2017	Equus caballus	Female	H. marginatum	Hap_47	3	PV051566	PV019617
390_FR11_A2_17_EQU_F	France	Aude	Termes	2017	Equus caballus	Female	H. marginatum	Hap_17	1	PV051567	PV019618
391_FR11_A2_17_EQU_F	France	Aude	Termes	2017	Equus caballus	Female	H. marginatum	Hap_17	1	PV051568	PV019619
411_FR2B_A1_18_EQU_F	France	Haute-Corse	Borgo	2018	Equus caballus	Female	H. marginatum	Hap_47	3	PV051569	PV019620
412_FR2B_A2_18_EQU_M	France	Haute-Corse	Monticello	2018	Equus caballus	Male	H. marginatum	Hap_17	1	PV051570	PV019621
413_FR2B_A2_18_EQU_F	France	Haute-Corse	Ghisonacia	2018	Equus caballus	Female	H. marginatum	Hap_18	2	PV051571	PV019622
417_FR2A_A3_18_EQU_M	France	Corse-du-Sud	Cargèse	2018	Equus caballus	Male	H. marginatum	Hap_17	1	PV051572	PV019623
418_FR2A_A3_18_EQU_M	France	Corse-du-Sud	Cargèse	2018	Equus caballus	Male	H. marginatum	Hap_35	3	PV051573	PV019624
428_FR2A_A4_18_EQU_M	France	Corse-du-Sud	Sagone	2018	Equus caballus	Male	H. marginatum	Hap_41	3	PV051574	PV019625
429_FR2A_A4_18_EQU_M	France	Corse-du-Sud	Sagone	2018	Equus caballus	Male	H. marginatum	Hap_47	3	PV051575	PV019626
444_FR2A_A5_18_EQU_M	France	Corse-du-Sud	Sagone	2018	Equus caballus	Male	H. marginatum	Hap_17	1	PV051576	PV019627
445_FR2A_A5_18_EQU_M	France	Corse-du-Sud	Sagone	2018	Equus caballus	Male	H. marginatum	Hap_17	1	PV051577	PV019628
446_FR2A_A5_18_EQU_F	France	Corse-du-Sud	Sagone	2018	Equus caballus	Female	H. marginatum	Hap_47	3	PV051578	PV019629
447_FR2A_A6_18_EQU_M	France	Corse-du-Sud	Cargèse	2018	Equus caballus	Male	H. marginatum	Hap_31	3	PV051579	PV019630
448_FR2B_A7_18_EQU_M	France	Haute-Corse	Oletta	2018	Equus caballus	Male	H. marginatum	Hap_17	1	PV051580	PV019631
449_FR2B_A7_18_EQU_F	France	Haute-Corse	Ghisonacia	2018	Equus caballus	Female	H. marginatum	Hap_23	3	PV051581	PV019632
450_FR2B_A7_18_EQU_F	France	Haute-Corse	Oletta	2018	Equus caballus	Female	H. marginatum	Hap_17	1	PV051582	PV019633
451_FR2B_A7_18_EQU_F	France	Haute-Corse	Oletta	2018	Equus caballus	Female	H. marginatum	Hap_47	3	PV051583	PV019634
452_FR2A_A8_18_EQU_M	France	Corse-du-Sud	Porto	2018	Equus caballus	Male	H. marginatum	Hap_17	1	PV051584	PV019635
453_FR2A_A8_18_EQU_M	France	Corse-du-Sud	Porto	2018	Equus caballus	Male	H. marginatum	Hap_1	1	PV051585	PV019636
458_FR2A_A8_18_EQU_M	France	Corse-du-Sud	Porto	2018	Equus caballus	Male	H. marginatum	Hap_47	3	PV051586	PV019637
459_FR2A_A8_18_EQU_M	France	Corse-du-Sud	Porto	2018	Equus caballus	Male	H. marginatum	Hap_17	1	PV051587	PV019638
461_FR2A_A9_18_EQU_F	France	Corse-du-Sud	Sartene	2018	Equus caballus	Female	H. marginatum	Hap_17	1	PV051588	PV019639
463_FR2B_A10_18_EQU_M	France	Haute-Corse	Corte	2018	Equus caballus	Male	H. marginatum	Hap_42	3	PV051589	PV019640
464_FR2B_A10_18_EQU_M	France	Haute-Corse	Corte	2018	Equus caballus	Male	H. marginatum	Hap_17	1	PV051590	PV019641
476_FR2B_A10_18_EQU_F	France	Haute-Corse	Corte	2018	Equus caballus	Female	H. marginatum	Hap_47	3	PV051591	PV019642
477_FR2B_A10_18_EQU_F	France	Haute-Corse	Corte	2018	Equus caballus	Female	H. marginatum	Hap_36	3	PV051592	PV019643
481_FR2A_B1_18_EQU_F	France	Corse-du-Sud	Cargèse	2018	Equus caballus	Female	H. marginatum	Hap_1	1	PV051593	PV019644
482_FR2A_B1_18_EQU_F	France	Corse-du-Sud	Cargèse	2018	Equus caballus	Female	H. marginatum	Hap_17	1	PV051594	PV019645
486_FR2A_B1_18_EQU_M	France	Corse-du-Sud	Cargèse	2018	Equus caballus	Male	H. marginatum	Hap_1	1	PV051595	PV019646
487_FR2A_B1_18_EQU_M	France	Corse-du-Sud	Cargèse	2018	Equus caballus	Male	H. marginatum	Hap_24	3	PV051596	PV019647
491_FR2B_B4_18_EQU_M	France	Haute-Corse	Corte	2018	Equus caballus	Male	H. marginatum	Hap_17	1	PV051597	PV019648
492_FR2B_B4_18_EQU_M	France	Haute-Corse	Corte	2018	Equus caballus	Male	H. marginatum	Hap_17	1	PV051598	PV019649
497_FR2B_B4_18_EQU_F	France	Haute-Corse	Corte	2018	Equus caballus	Female	H. marginatum	Hap_47	3	PV051599	PV019650
498_FR2B_B4_18_EQU_F	France	Haute-Corse	Corte	2018	Equus caballus	Female	H. marginatum	Hap_47	3	PV051600	PV019651
500_FR2A_B2_18_EQU_M	France	Corse-du-Sud	Sagone	2018	Equus caballus	Male	H. marginatum	Hap_47	3	PV051601	PV019652
501_FR2A_B2_18_EQU_M	France	Corse-du-Sud	Sagone	2018	Equus caballus	Male	H. marginatum	Hap_47	3	PV051602	PV019653
505_FR2A_B2_18_EQU_F	France	Corse-du-Sud	Sagone	2018	Equus caballus	Female	H. marginatum	Hap_45	3	PV051603	PV019654
506_FR2A_B2_18_EQU_F	France	Corse-du-Sud	Sagone	2018	Equus caballus	Female	H. marginatum	Hap_27	3	PV051604	PV019655
513_FR2B_B3_18_EQU_M	France	Haute-Corse	Solaro	2018	Equus caballus	Male	H. marginatum	Hap_17	1	PV051605	PV019656
514_FR2B_B3_18_EQU_M	France	Haute-Corse	Solaro	2018	Equus caballus	Male	H. marginatum	Hap_22	3	PV051606	PV019657
519_FR2B_B3_18_EQU_F	France	Haute-Corse	Solaro	2018	Equus caballus	Female	H. marginatum	Hap_17	1	PV051607	PV019658
520_FR2B_B3_18_EQU_F	France	Haute-Corse	Solaro	2018	Equus caballus	Female	H. marginatum	Hap_17	1	PV051608	PV019659
545_FR2A_B5_18_EQU_M	France	Corse-du-Sud	Sagone	2018	Equus caballus	Male	H. marginatum	Hap_4	1	PV051609	PV019660
546_FR2B_B6_18_EQU_F	France	Haute-Corse	Farinole	2018	Equus caballus	Female	H. marginatum	Hap_47	3	PV051610	PV019661
547_FR2B_B6_18_EQU_F	France	Haute-Corse	Farinole	2018	Equus caballus	Female	H. marginatum	Hap_37	3	PV051611	PV019662
548_FR2A_B7_18_EQU_F	France	Corse-du-Sud	Zonza	2018	Equus caballus	Female	H. marginatum	Hap_41	3	PV051612	PV019663
549_FR2A_B7_18_EQU_F	France	Corse-du-Sud	Zonza	2018	Equus caballus	Female	H. marginatum	Hap_14	1	PV051613	PV019664
550_FR2A_B7_18_EQU_F	France	Corse-du-Sud	Zonza	2018	Equus caballus	Female	H. marginatum	Hap_47	3	PV051614	PV019665
551_FR2B_B8_18_EQU_M	France	Haute-Corse	Ghisonacia	2018	Equus caballus	Male	H. marginatum	Hap_17	1	PV051615	PV019666
552_FR2B_B8_18_EQU_M	France	Haute-Corse	Ghisonacia	2018	Equus caballus	Male	H. marginatum	Hap_38	3	PV051616	PV019667
555_FR2B_B8_18_EQU_F	France	Haute-Corse	Ghisonacia	2018	Equus caballus	Female	H. marginatum	Hap_47	3	PV051617	PV019668
556_FR2B_B8_18_EQU_F	France	Haute-Corse	Ghisonacia	2018	Equus caballus	Female	H. marginatum	Hap_47	3	PV051618	PV019669
559_FR34_128-1_16_SUS_F	France	Gard	La Lauze	2016	Sus scrofa	Female	H. marginatum	Hap_47	3	PV051619	PV019670
560_FR34_B5_18_SUS_M	France	Hérault	Juvignac	2018	Sus scrofa	Male	H. marginatum	Hap_47	3	PV051620	PV019671
561_FR34_128-2_16_SUS_M	France	Gard	La Lauze	2016	Sus scrofa	Male	H. marginatum	Hap_47	3	PV051621	PV019672
562_FR34_128-2_16_SUS_M	France	Gard	La Lauze	2016	Sus scrofa	Male	H. marginatum	Hap_45	3	PV051622	PV019673
563_FR34_128-2_16_SUS_M	France	Gard	La Lauze	2016	Sus scrofa	Male	H. marginatum	Hap_45	3	PV051623	PV019674
564_FR34_128-10_16_SUS_M	France	Gard	La Lauze	2016	Sus scrofa	Male	H. marginatum	Hap_47	3	PV051624	PV019675
565_FR34_128-3_16_SUS_F	France	Gard	La Lauze	2016	Sus scrofa	Female	H. marginatum	Hap_47	3	PV051625	PV019676
566_FR30_LAUZ_17_TUR_N	France	Gard	Pompignan	2017	Turdus merula	Nymph	H. marginatum	Hap_47	3	PV051626	PV019677
567_FR30_LAUZ_17_TUR_N	France	Gard	Pompignan	2017	Turdus merula	Nymph	H. marginatum	Hap_47	3	PV051627	PV019678
571_FR30_LAUZ_17_TUR_M	France	Gard	Pompignan	2017	Turdus merula	Nymph	H. marginatum	Hap_47	3	PV051628	PV019679
572_FR30_LAUZ_17_TUR_M	France	Gard	Pompignan	2017	Turdus merula	Nymph	H. marginatum	Hap_45	3	PV051629	PV019680
573_FR30_LAUZ_17_TUR_M	France	Gard	Pompignan	2017	Turdus merula	Nymph	H. marginatum	Hap_47	3	PV051630	PV019681
578_FR30_LAUZ_17_TUR_F	France	Gard	Pompignan	2017	Turdus merula	Nymph	H. marginatum	Hap_47	3	PV051631	PV019682
579_FR30_LAUZ_17_TUR_F	France	Gard	Pompignan	2017	Turdus merula	Nymph	H. marginatum	Hap_47	3	PV051632	PV019683
585_FR30_LAUZ_17_ERI_N	France	Gard	Pompignan	2017	Erithacus rubecula	Nymph	H. marginatum	Hap_47	3	PV051633	PV019684
586_FR30_LAUZ_17_TUR_N	France	Gard	Pompignan	2017	Turdus merula	Nymph	H. marginatum	Hap_47	3	PV051634	PV019685
587_FR30_LAUZ_17_TUR_N	France	Gard	Pompignan	2017	Turdus merula	Nymph	H. marginatum	Hap_47	3	PV051635	PV019686
592_FR30_LAUZ_17_TUR_N	France	Gard	Pompignan	2017	Turdus merula	Nymph	H. marginatum	Hap_47	3	PV051636	PV019687
593_FR30_LAUZ_17_TUR_N	France	Gard	Pompignan	2017	Turdus merula	Nymph	H. marginatum	Hap_47	3	PV051637	PV019688
596_FR30_LAUZ_17_TUR_L	France	Gard	Pompignan	2017	Turdus merula	Larvae	H. marginatum	Hap_47	3	PV051638	PV019689
598_FR30_LAUZ_17_TUR_N	France	Gard	Pompignan	2017	Turdus merula	Nymph	H. marginatum	Hap_47	3	PV051639	PV019690
601_FR30_LAUZ_17_ERI_L	France	Gard	Pompignan	2017	Erithacus rubecula	Larvae	H. marginatum	Hap_47	3	PV051640	PV019691
602_FR30_LAUZ_17_ERI_L	France	Gard	Pompignan	2017	Erithacus rubecula	Larvae	H. marginatum	Hap_47	3	PV051641	PV019692
609_FR30_LAUZ_17_ERI_N	France	Gard	Pompignan	2017	Erithacus rubecula	Nymph	H. marginatum	Hap_47	3	PV051642	PV019693
610_FR30_LAUZ_17_ERI_N	France	Gard	Pompignan	2017	Erithacus rubecula	Nymph	H. marginatum	Hap_47	3	PV051643	PV019694
611_FR30_LAUZ_17_ERI_N	France	Gard	Pompignan	2017	Erithacus rubecula	Nymph	H. marginatum	Hap_47	3	PV051644	PV019695
612_FR30_LAUZ_17_ERI_N	France	Gard	Pompignan	2017	Erithacus rubecula	Nymph	H. marginatum	Hap_47	3	PV051645	PV019696
613_FR30_LAUZ_17_LUS_N	France	Gard	Pompignan	2017	Luscinia megarhynchos	Nymph	H. marginatum	Hap_47	3	PV051646	PV019697
614_FR30_LAUZ_17_LUS_N	France	Gard	Pompignan	2017	Luscinia megarhynchos	Nymph	H. marginatum	Hap_47	3	PV051647	PV019698
615_FR30_LAUZ_17_LUS_N	France	Gard	Pompignan	2017	Luscinia megarhynchos	Nymph	H. marginatum	Hap_47	3	PV051648	PV019699
616_FR30_LAUZ_17_LUS_N	France	Gard	Pompignan	2017	Luscinia megarhynchos	Nymph	H. marginatum	Hap_47	3	PV051649	PV019700
617_FR30_LAUZ_17_LUS_N	France	Gard	Pompignan	2017	Luscinia megarhynchos	Nymph	H. marginatum	Hap_47	3	PV051650	PV019701
618_FR30_LAUZ_17_LUS_N	France	Gard	Pompignan	2017	Luscinia megarhynchos	Nymph	H. marginatum	Hap_45	3	PV051651	PV019702
619_FR30_LAUZ_17_LUS_N	France	Gard	Pompignan	2017	Luscinia megarhynchos	Nymph	H. marginatum	Hap_47	3	PV051652	PV019703
620_FR30_LAUZ_17_LUS_N	France	Gard	Pompignan	2017	Luscinia megarhynchos	Nymph	H. marginatum	Hap_47	3	PV051653	PV019704
623_FR34_Y2_17_EQU_F	France	Hérault	Rieussec	2017	Equus caballus	Female	H. marginatum	Hap_31	3	PV051654	PV019705
624_FR34_Z1_17_EQU_M	France	Hérault	Octon	2017	Equus caballus	Male	H. marginatum	Hap_47	3	PV051655	PV019706
625_FR34_Z1_17_EQU_M	France	Hérault	Octon	2017	Equus caballus	Male	H. marginatum	Hap_47	3	PV051656	PV019707
626_FR34_Y1_17_EQU_M	France	Hérault	Rieussec	2017	Equus caballus	Male	H. marginatum	Hap_30	3	PV051657	PV019708
627_FR34_Y1_17_EQU_M	France	Hérault	Rieussec	2017	Equus caballus	Male	H. marginatum	Hap_47	3	PV051658	PV019709
629_FR34_Z2_17_EQU_F	France	Hérault	Octon	2017	Equus caballus	Female	H. marginatum	Hap_47	3	PV051659	PV019710
630_FR34_Z2_17_EQU_F	France	Hérault	Octon	2017	Equus caballus	Female	H. marginatum	Hap_47	3	PV051660	PV019711
631_FR30_LAUZ_18_EQU_M	France	Gard	Pompignan	2018	Equus caballus	Male	H. marginatum	Hap_47	3	PV051661	PV019712
632_FR30_LAUZ_18_EQU_M	France	Gard	Pompignan	2018	Equus caballus	Male	H. marginatum	Hap_47	3	PV051662	PV019713
635_FR30_LAUZ_18_EQU_F	France	Gard	Pompignan	2018	Equus caballus	Female	H. marginatum	Hap_47	3	PV051663	PV019714
636_FR30_LAUZ_18_EQU_F	France	Gard	Pompignan	2018	Equus caballus	Female	H. marginatum	Hap_47	3	PV051664	PV019715
654_FR30_153-12_16_EQU_F	France	Gard	Pompignan	2016	Equus caballus	Female	H. marginatum	Hap_47	3	PV051665	PV019716
663_FR30_137-8_16_EQU_F	France	Gard	Pompignan	2016	Equus caballus	Female	H. marginatum	Hap_47	3	PV051666	PV019717
671_FR30_LAUZ_18_EQU_F	France	Gard	Pompignan	2018	Equus caballus	Female	H. marginatum	Hap_47	3	PV051667	PV019718
677_FR30_B4_18_EQU_M	France	Gard	Pompignan	2018	Equus caballus	Male	H. marginatum	Hap_45	3	PV051668	PV019719
686_FR30_LAUZ_18_EQU_F	France	Gard	Pompignan	2018	Equus caballus	Female	H. marginatum	Hap_47	3	PV051669	PV019720
687_FR30_LAUZ_18_EQU_F	France	Gard	Pompignan	2018	Equus caballus	Female	H. marginatum	Hap_47	3	PV051670	PV019721
717_FR2A_SAG_18_EQU_M	France	Corse-du-Sud	Sagone	2018	Equus caballus	Male	H. marginatum	Hap_17	1	PV051671	PV019722
800_FR07_NS61_19_EQU	France	Ardèche	La loubière	2019	Equus caballus	Female	H. marginatum	Hap_45	3	PV051672	PV019723
801_FR07_NS62_19_EQU	France	Ardèche	La loubière	2019	Equus caballus	Female	H. marginatum	Hap_45	3	PV051673	PV019724
802_FR07_NS63_19_EQU	France	Ardèche	La loubière	2019	Equus caballus	Female	H. marginatum	Hap_49	3	PV051674	PV019725
803_FR07_NS64_19_EQU	France	Ardèche	La loubière	2019	Equus caballus	Female	H. marginatum	Hap_45	3	PV051675	PV019726
804_FR07_NS65_19_EQU	France	Ardèche	La loubière	2019	Equus caballus	Female	H. marginatum	Hap_45	3	PV051676	PV019727
805_FR07_NS66_19_EQU	France	Ardèche	La loubière	2019	Equus caballus	Female	H. marginatum	Hap_49	3	PV051677	PV019728
806_FR07_NS67_19_EQU	France	Ardèche	La loubière	2019	Equus caballus	Female	H. marginatum	Hap_45	3	PV051678	PV019729
807_FR07_NS81_19_EQU	France	Ardèche	Maison-Neuve Chandolas	2019	Equus caballus	Male	H. marginatum	Hap_47	3	PV051679	PV019730
808_FR07_NS82_19_EQU	France	Ardèche	Maison-Neuve Chandolas	2019	Equus caballus	Male	H. marginatum	Hap_47	3	PV051680	PV019731
809_FR07_NS83_19_EQU	France	Ardèche	Maison-Neuve Chandolas	2019	Equus caballus	Male	H. marginatum	Hap_47	3	PV051681	PV019732
810_FR07_NS84_19_EQU	France	Ardèche	Maison-Neuve Chandolas	2019	Equus caballus	Male	H. marginatum	Hap_47	3	PV051682	PV019733
811_FR07_NS85_19_EQU	France	Ardèche	Maison-Neuve Chandolas	2019	Equus caballus	Male	H. marginatum	Hap_47	3	PV051683	PV019734
812_FR07_NS86_19_EQU	France	Ardèche	Maison-Neuve Chandolas	2019	Equus caballus	Male	H. marginatum	Hap_47	3	PV051684	PV019735
813_FR07_NS87_19_EQU	France	Ardèche	Maison-Neuve Chandolas	2019	Equus caballus	Male	H. marginatum	Hap_47	3	PV051685	PV019736
814_FR07_F071_21_EQU	France	Ardèche	La loubière	2021	Equus caballus	A	H. marginatum	Hap_45	3	PV051686	PV019737
815_FR07_F072_21_EQU	France	Ardèche	La loubière	2021	Equus caballus	A	H. marginatum	Hap_45	3	PV051687	PV019738
817_FR07_F074_21_EQU	France	Ardèche	La loubière	2021	Equus caballus	A	H. marginatum	Hap_47	3	PV051688	PV019739
818_FR07_F075_21_EQU	France	Ardèche	La loubière	2021	Equus caballus	A	H. marginatum	Hap_45	3	PV051689	PV019740
819_FR07_F076_21_EQU	France	Ardèche	La loubière	2021	Equus caballus	A	H. marginatum	Hap_47	3	PV051690	PV019741
820_FR07_F077_21_EQU	France	Ardèche	La loubière	2021	Equus caballus	A	H. marginatum	Hap_45	3	PV051691	PV019742
821_FR07_ILO1_21_EQU	France	Ardèche	Équidena	2021	Equus caballus	Female	H. marginatum	Hap_49	3	PV051692	PV019743
822_FR07_ILO2_21_EQU	France	Ardèche	Équidena	2021	Equus caballus	Female	H. marginatum	Hap_49	3	PV051693	PV019744
823_FR07_ILO3_21_EQU	France	Ardèche	Équidena	2021	Equus caballus	Female	H. marginatum	Hap_49	3	PV051694	PV019745
824_FR07_ILO4_21_EQU	France	Ardèche	Équidena	2021	Equus caballus	Female	H. marginatum	Hap_49	3	PV051695	PV019746
825_FR07_ILO5_21_EQU	France	Ardèche	Équidena	2021	Equus caballus	Female	H. marginatum	Hap_47	3	PV051696	PV019747
826_FR07_07A1_21_EQU	France	Ardèche	Le solitauy	2021	Equus caballus	Female	H. marginatum	Hap_36	3	PV051697	PV019748
827_FR07_07A2_21_EQU	France	Ardèche	Le solitauy	2021	Equus caballus	Female	H. marginatum	Hap_36	3	PV051698	PV019749
828_FR07_07A3_21_EQU	France	Ardèche	Le solitauy	2021	Equus caballus	Female	H. marginatum	Hap_47	3	PV051699	PV019750
829_FR07_07A4_21_EQU	France	Ardèche	Le solitauy	2021	Equus caballus	Female	H. marginatum	Hap_45	3	PV051700	PV019751
830_FR07_IMA1_21_EQU	France	Ardèche	Maison-Neuve Chandolas	2021	Equus caballus	Male	H. marginatum	Hap_47	3	PV051701	PV019752
831_FR07_IMA2_21_EQU	France	Ardèche	Maison-Neuve Chandolas	2021	Equus caballus	Male	H. marginatum	Hap_47	3	PV051702	PV019753
832_FR07_IMA3_21_EQU	France	Ardèche	Maison-Neuve Chandolas	2021	Equus caballus	Male	H. marginatum	Hap_47	3	PV051703	PV019754
833_FR07_IMA4_21_EQU	France	Ardèche	Maison-Neuve Chandolas	2021	Equus caballus	Female	H. marginatum	Hap_47	3	PV051704	PV019755
835_FR11_A2_18_EQU	France	Aude	Rennes-le-Chateau	2018	Equus caballus	Male	H. marginatum	Hap_11	1	PV051705	PV019756
836_FR11_A91_18_EQU	France	Aude	La Louvière-Lauragais	2018	Equus caballus	Male	H. marginatum	Hap_50	3	PV051706	PV019757
837_FR11_A92_18_EQU	France	Aude	La Louvière-Lauragais	2018	Equus caballus	Male	H. marginatum	Hap_50	3	PV051707	PV019758
841_FR26_26I1_21_EQU	France	Drôme	Chantemerle-lès-Grignan	2021	Equus caballus	Male	H. marginatum	Hap_49	3	PV051708	PV019759
842_FR26_26I2_21_EQU	France	Drôme	Chantemerle-lès-Grignan	2021	Equus caballus	Male	H. marginatum	Hap_47	3	PV051709	PV019760
843_FR26_26I3_21_EQU	France	Drôme	Chantemerle-lès-Grignan	2021	Equus caballus	Male	H. marginatum	Hap_47	3	PV051710	PV019761
844_FR26_26I4_21_EQU	France	Drôme	Chantemerle-lès-Grignan	2021	Equus caballus	Male	H. marginatum	Hap_47	3	PV051711	PV019762
845_FR26_26I5_21_EQU	France	Drôme	Chantemerle-lès-Grignan	2021	Equus caballus	Male	H. marginatum	Hap_47	3	PV051712	PV019763
846_FR26_26J1_21_EQU	France	Drôme	Pierrelatte	2021	Equus caballus	Male	H. marginatum	Hap_47	3	PV051713	PV019764
847_FR26_26J2_21_EQU	France	Drôme	Pierrelatte	2021	Equus caballus	Male	H. marginatum	Hap_49	3	PV051714	PV019765
848_FR26_26J3_21_EQU	France	Drôme	Pierrelatte	2021	Equus caballus	Male	H. marginatum	Hap_36	3	PV051715	PV019766
849_FR26_26J4_21_EQU	France	Drôme	Pierrelatte	2021	Equus caballus	Female	H. marginatum	Hap_49	3	PV051716	PV019767
850_FR26_26J5_21_EQU	France	Drôme	Pierrelatte	2021	Equus caballus	Female	H. marginatum	Hap_47	3	PV051717	PV019768
851_FR30_B43_19_EQU	France	Gard	Pompignan	2019	Equus caballus	A	H. marginatum	Hap_47	3	PV051718	PV019769
852_FR30_B45_19_EQU	France	Gard	Pompignan	2019	Equus caballus	A	H. marginatum	Hap_47	3	PV051719	PV019770
853_FR30_B46_19_EQU	France	Gard	Pompignan	2019	Equus caballus	A	H. marginatum	Hap_45	3	PV051720	PV019771
854_FR30_B47_19_EQU	France	Gard	Pompignan	2019	Equus caballus	A	H. marginatum	Hap_47	3	PV051721	PV019772
856_FR30_NS101_19_EQU	France	Gard	Mejannes le clap	2019	Equus caballus	Female	H. marginatum	Hap_45	3	PV051722	PV019773
857_FR30_NS102_19_EQU	France	Gard	Méjannes-le-Clap	2019	Equus caballus	Female	H. marginatum	Hap_45	3	PV051723	PV019774
858_FR30_NS103_19_EQU	France	Gard	Méjannes-le-Clap	2019	Equus caballus	Female	H. marginatum	Hap_47	3	PV051724	PV019775
859_FR30_NS104_19_EQU	France	Gard	Méjannes-le-Clap	2019	Equus caballus	Male	H. marginatum	Hap_45	3	PV051725	PV019776
860_FR30_NS105_19_EQU	France	Gard	Méjannes-le-Clap	2019	Equus caballus	Male	H. marginatum	Hap_51	2	PV051726	PV019777
862_FR30_Con1_20_EQU	France	Gard	Conqueyrac	2020	Equus caballus	Male	H. marginatum	Hap_47	3	PV051727	PV019778
863_FR30_Con2_20_EQU	France	Gard	Conqueyrac	2020	Equus caballus	Male	H. marginatum	Hap_36	3	PV051728	PV019779
864_FR30_Con3_20_EQU	France	Gard	Conqueyrac	2020	Equus caballus	Male	H. marginatum	Hap_47	3	PV051729	PV019780
865_FR30_Con4_20_EQU	France	Gard	Conqueyrac	2020	Equus caballus	Female	H. marginatum	Hap_47	3	PV051730	PV019781
866_FR30_L1_20_EQU	France	Gard	Pompignan	2020	Equus caballus	Male	H. marginatum	Hap_47	3	PV051731	PV019782
867_FR30_L2_20_EQU	France	Gard	Pompignan	2020	Equus caballus	Male	H. marginatum	Hap_47	3	PV051732	PV019783
868_FR30_L3_20_EQU	France	Gard	Pompignan	2020	Equus caballus	Male	H. marginatum	Hap_47	3	PV051733	PV019784
870_FR30_L5_20_EQU	France	Gard	Pompignan	2020	Equus caballus	Male	H. marginatum	Hap_47	3	PV051734	PV019785
871_FR30_L6_20_EQU	France	Gard	Pompignan	2020	Equus caballus	Female	H. marginatum	Hap_47	3	PV051735	PV019786
872_FR30_Hm1_21_EQU	France	Gard	Pompignan	2021	Equus caballus	A	H. marginatum	Hap_47	3	PV051736	PV019787
873_FR30_Hm2_21_EQU	France	Gard	Pompignan	2021	Equus caballus	A	H. marginatum	Hap_45	3	PV051737	PV019788
874_FR30_Hm3_21_EQU	France	Gard	Pompignan	2021	Equus caballus	A	H. marginatum	Hap_45	3	PV051738	PV019789
875_FR30_Hm4_21_EQU	France	Gard	Pompignan	2021	Equus caballus	A	H. marginatum	Hap_47	3	PV051739	PV019790
876_FR30_Hm5_21_EQU	France	Gard	Pompignan	2021	Equus caballus	A	H. marginatum	Hap_47	3	PV051740	PV019791
877_FR30_30F1_21_EQU	France	Gard	Méjannes-le-Clap	2021	Equus caballus	Male	H. marginatum	Hap_47	3	PV051741	PV019792
878_FR30_30F2_21_EQU	France	Gard	Méjannes-le-Clap	2021	Equus caballus	Male	H. marginatum	Hap_47	3	PV051742	PV019793
879_FR30_30F3_21_EQU	France	Gard	Méjannes-le-Clap	2021	Equus caballus	Male	H. marginatum	Hap_45	3	PV051743	PV019794
880_FR30_30F4_21_EQU	France	Gard	Méjannes-le-Clap	2021	Equus caballus	Female	H. marginatum	Hap_48	1	PV051744	PV019795
881_FR34_34A1_21_EQU	France	Hérault	Lauret	2021	Equus caballus	Male	H. marginatum	Hap_47	3	PV051745	PV019796
882_FR34_34A2_21_EQU	France	Hérault	Lauret	2021	Equus caballus	Male	H. marginatum	Hap_47	3	PV051746	PV019797
883_FR34_34A3_21_EQU	France	Hérault	Lauret	2021	Equus caballus	Male	H. marginatum	Hap_47	3	PV051747	PV019798
884_FR34_34A4_21_EQU	France	Hérault	Lauret	2021	Equus caballus	Male	H. marginatum	Hap_47	3	PV051748	PV019799
885_FR34_34A5_21_EQU	France	Hérault	Lauret	2021	Equus caballus	Female	H. marginatum	Hap_47	3	PV051749	PV019800
886_FR34_34B1_21_EQU	France	Hérault	Notre-Dame-de-Londres	2021	Equus caballus	Male	H. marginatum	Hap_45	3	PV051750	PV019801
887_FR34_34B2_21_EQU	France	Hérault	Notre-Dame-de-Londres	2021	Equus caballus	Male	H. marginatum	Hap_47	3	PV051751	PV019802
888_FR34_34B3_21_EQU	France	Hérault	Notre-Dame-de-Londres	2021	Equus caballus	Male	H. marginatum	Hap_47	3	PV051752	PV019803
889_FR34_34B4_21_EQU	France	Hérault	Notre-Dame-de-Londres	2021	Equus caballus	Male	H. marginatum	Hap_47	3	PV051753	PV019804
890_FR34_34B5_21_EQU	France	Hérault	Notre-Dame-de-Londres	2021	Equus caballus	Male	H. marginatum	Hap_47	3	PV051754	PV019805
891_FR81_EO131_19_EQU	France	Tarn	Albi	2019	Equus caballus	Male	H. marginatum	Hap_19	2	PV051755	PV019806
892_FR83_Bar1_20_EQU	France	Var	Fayence	2020	Equus caballus	Male	H. marginatum	Hap_19	2	PV051756	PV019807
893_FR83_Bar2_20_EQU	France	Var	Fayence	2020	Equus caballus	Male	H. marginatum	Hap_19	2	PV051757	PV019808
894_FR83_Bar3_20_EQU	France	Var	Fayence	2020	Equus caballus	Male	H. marginatum	Hap_10	2	PV051758	PV019809
896_FR83_Bar5_20_EQU	France	Var	Fayence	2020	Equus caballus	Male	H. marginatum	Hap_19	2	PV051759	PV019810
897_FR83_Bar6_20_EQU	France	Var	Fayence	2020	Equus caballus	Female	H. marginatum	Hap_19	2	PV051760	PV019811
898_2A_Bov1_19_Bos	France	Corse-du-Sud	Sagone	2019	Bos taurus	Male	H. marginatum	Hap_17	1	PV051761	PV019812
899_2A_Bov2_19_Bos	France	Corse-du-Sud	Sagone	2019	Bos taurus	Male	H. marginatum	Hap_17	1	PV051762	PV019813
900_2A_Bov3_19_Bos	France	Corse-du-Sud	Sagone	2019	Bos taurus	Male	H. marginatum	Hap_17	1	PV051763	PV019814
902_2A_Bov5_19_Bos	France	Corse-du-Sud	Sagone	2019	Bos taurus	Male	H. marginatum	Hap_47	3	PV051764	PV019815
903_IT_1_12__F	Italy	Sicily	Palermo	2012	Bos taurus	Female	H. marginatum	Hap_17	1	PV051765	PV019816
906_IT_4_12__M	Italy	Sicily	Palermo	2012	Bos taurus	Male	H. marginatum	Hap_1	1	PV051766	PV019817
910_IT_3_16__M	Italy	Sicily	Palermo	2016	Sus scrofa	Male	H. marginatum	Hap_17	1	PV051767	PV019818
912_IT_5_16__M	Italy	Sicily	Palermo	2016	Sus scrofa	Male	H. marginatum	Hap_17	1	PV051768	PV019819
913_ES_1M_19_Equ_M	Spain	Andalusia	Doñana	2019	Equus caballus	Male	H. marginatum	Hap_47	3	PV051769	PV019820
914_ES_1M_19_Equ_M	Spain	Andalusia	Doñana	2019	Equus caballus	Male	H. marginatum	Hap_47	3	PV051770	PV019821
917_ES_4F_19_Equ_F	Spain	Andalusia	Doñana	2019	Equus caballus	Female	H. marginatum	Hap_47	3	PV051771	PV019822
919_ES_15M_20_Bos_M	Spain	Estrémadure	Madrigalejo	2020	Bos taurus	Male	H. marginatum	Hap_6	2	PV051772	PV019823
920_ES_15M_20_Bos_M	Spain	Estrémadure	Madrigalejo	2020	Bos taurus	Male	H. marginatum	Hap_7	3	PV051773	PV019824
921_ES_15M_20_Bos_M	Spain	Estrémadure	Madrigalejo	2020	Bos taurus	Male	H. marginatum	Hap_7	3	PV051774	PV019825
936_IL_Dt7_14_Equ_M	Israel	Haifa	Beit Oren	2014	Equus caballus	Male	H. marginatum	Hap_3	3	PV051775	PV019826
938_IL_Dt13_14_Equ_M	Israel	Haifa	Beit Oren	2014	Equus caballus	Male	H. marginatum	Hap_47	3	PV051776	PV019827
939_IL_Dt17_14_Equ_M	Israel	Haifa	Beit Oren	2014	Equus caballus	Male	H. marginatum	Hap_9	3	PV051777	PV019828
940_IL_Dt19_14_Equ_M	Israel	Haifa	Beit Oren	2014	Equus caballus	Male	H. marginatum	Hap_47	3	PV051778	PV019829
942_FR83_C1_22_EQU_M	France	Var	Fayence	2022	Equus caballus	Male	H. marginatum	Hap_19	2	PV051779	PV019830
943_FR83_C2_22_EQU_M	France	Var	Fayence	2022	Equus caballus	Male	H. marginatum	Hap_19	2	PV051780	PV019831
944_FR83_C3_22_EQU_M	France	Var	Fayence	2022	Equus caballus	Male	H. marginatum	Hap_19	2	PV051781	PV019832
945_FR83_C4_22_EQU_M	France	Var	Fayence	2022	Equus caballus	Male	H. marginatum	Hap_19	2	PV051782	PV019833
946_FR83_C5_22_EQU_M	France	Var	Fayence	2022	Equus caballus	Male	H. marginatum	Hap_19	2	PV051783	PV019834
947_FR83_O1_22_EQU_F	France	Var	Bormes les mimosas	2022	Equus caballus	Female	H. marginatum	Hap_10	2	PV051784	PV019835
949_FR83_O3_22_EQU_F	France	Var	Bormes les mimosas	2022	Equus caballus	Female	H. marginatum	Hap_19	2	PV051785	PV019836
950_FR83_O4_22_EQU_F	France	Var	Bormes les mimosas	2022	Equus caballus	Female	H. marginatum	Hap_19	2	PV051786	PV019837
951_FR83_O5_22_EQU_F	France	Var	Bormes les mimosas	2022	Equus caballus	Female	H. marginatum	Hap_19	2	PV051787	PV019838
952_FR11_AA9_22_EQU_F	France	Aude	Rouffiac	2022	Equus caballus	Female	H. marginatum	Hap_47	3	PV051788	PV019839
953_FR11_AA10_22_EQU_F	France	Aude	Rouffiac	2022	Equus caballus	Female	H. marginatum	Hap_17	1	PV051789	PV019840
954_FR11_AA11_22_EQU_F	France	Aude	Rouffiac	2022	Equus caballus	Female	H. marginatum	Hap_47	3	PV051790	PV019841
955_FR11_AA12_22_EQU_F	France	Aude	Rouffiac	2022	Equus caballus	Female	H. marginatum	Hap_17	1	PV051791	PV019842
956_FR11_AA13_22_EQU_F	France	Aude	Rouffiac	2022	Equus caballus	Female	H. marginatum	Hap_36	3	PV051792	PV019843
957_FR11_AC19_22_EQU_M	France	Aude	Rennes le château	2022	Equus caballus	Male	H. marginatum	Hap_47	3	PV051793	PV019844
958_FR11_AC20_22_EQU_M	France	Aude	Rennes le château	2022	Equus caballus	Male	H. marginatum	Hap_47	3	PV051794	PV019845
959_FR11_AC21_22_EQU_M	France	Aude	Rennes le château	2022	Equus caballus	Male	H. marginatum	Hap_61	1	PV051795	PV019846
960_FR11_AC22_22_EQU_M	France	Aude	Rennes le château	2022	Equus caballus	Male	H. marginatum	Hap_11	1	PV051796	PV019847
961_FR11_AC23_22_EQU_M	France	Aude	Rennes le château	2022	Equus caballus	Male	H. marginatum	Hap_62	1	PV051797	PV019848
962_FR66_AF11_22_EQU_F	France	Pyrénées-Orientales	Montesquieu les Albères	2022	Equus caballus	Female	H. marginatum	Hap_17	1	PV051798	PV019849
963_FR66_AF12_22_EQU_F	France	Pyrénées-Orientales	Montesquieu les Albères	2022	Equus caballus	Female	H. marginatum	Hap_47	3	PV051799	PV019850
964_FR66_AF13_22_EQU_F	France	Pyrénées-Orientales	Montesquieu les Albères	2022	Equus caballus	Female	H. marginatum	Hap_47	3	PV051800	PV019851
965_FR66_AF14_22_EQU_F	France	Pyrénées-Orientales	Montesquieu les Albères	2022	Equus caballus	Female	H. marginatum	Hap_47	3	PV051801	PV019852
966_FR66_AF15_22_EQU_F	France	Pyrénées-Orientales	Montesquieu les Albères	2022	Equus caballus	Female	H. marginatum	Hap_11	1	PV051802	PV019853
967_FR11_AG1_22_EQU_F	France	Aude	Le plô	2022	Equus caballus	Female	H. marginatum	Hap_17	1	PV051803	PV019854
968_FR11_AG2_22_EQU_F	France	Aude	Le plô	2022	Equus caballus	Female	H. marginatum	Hap_17	1	PV051804	PV019855
969_FR11_AG3_22_EQU_F	France	Aude	Le plô	2022	Equus caballus	Female	H. marginatum	Hap_17	1	PV051805	PV019856
970_FR11_AG4_22_EQU_M	France	Aude	Le plô	2022	Equus caballus	Male	H. marginatum	Hap_17	1	PV051806	PV019857
971_FR11_AG5_22_EQU_M	France	Aude	Le plô	2022	Equus caballus	Male	H. marginatum	Hap_17	1	PV051807	PV019858
972_FR66_AH1_22_EQU_F	France	Pyrénées-Orientales	Fosse	2022	Bos taurus	Female	H. marginatum	Hap_47	3	PV051808	PV019859
973_FR66_AH2_22_EQU_F	France	Pyrénées-Orientales	Fosse	2022	Bos taurus	Female	H. marginatum	Hap_47	3	PV051809	PV019860
974_FR66_AH3_22_EQU_F	France	Pyrénées-Orientales	Fosse	2022	Bos taurus	Female	H. marginatum	Hap_47	3	PV051810	PV019861
975_FR66_AH4_22_EQU_F	France	Pyrénées-Orientales	Fosse	2022	Bos taurus	Female	H. marginatum	Hap_17	1	PV051811	PV019862
976_FR66_AH5_22_EQU_F	France	Pyrénées-Orientales	Fosse	2022	Bos taurus	Female	H. marginatum	Hap_47	3	PV051812	PV019863
977_FR66_AJ1_22_EQU_M	France	Pyrénées-Orientales	St-Génis-des-Fontaines	2022	Equus caballus	Male	H. marginatum	Hap_47	3	PV051813	PV019864
978_FR66_AJ2_22_EQU_M	France	Pyrénées-Orientales	St-Génis-des-Fontaines	2022	Equus caballus	Male	H. marginatum	Hap_19	2	PV051814	PV019865
979_FR66_AJ3_22_EQU_F	France	Pyrénées-Orientales	St-Génis-des-Fontaines	2022	Equus caballus	Female	H. marginatum	Hap_19	2	PV051815	PV019866
980_FR66_AJ4_22_EQU_F	France	Pyrénées-Orientales	St-Génis-des-Fontaines	2022	Equus caballus	Female	H. marginatum	Hap_19	2	PV051816	PV019867
981_FR66_AJ5_22_EQU_F	France	Pyrénées-Orientales	St-Génis-des-Fontaines	2022	Equus caballus	Female	H. marginatum	Hap_11	1	PV051817	PV019868
982_FR66_AK7_22_EQU_F	France	Pyrénées-Orientales	Montalba le château	2022	Equus caballus	Female	H. marginatum	Hap_17	1	PV051818	PV019869
983_FR66_AK8_22_EQU_F	France	Pyrénées-Orientales	Montalba le château	2022	Equus caballus	Female	H. marginatum	Hap_11	1	PV051819	PV019870
984_FR66_AK9_22_EQU_F	France	Pyrénées-Orientales	Montalba le château	2022	Equus caballus	Female	H. marginatum	Hap_17	1	PV051820	PV019871
985_FR66_AK10_22_EQU_F	France	Pyrénées-Orientales	Montalba le château	2022	Equus caballus	Female	H. marginatum	Hap_4	1	PV051821	PV019872
986_FR66_AK11_22_EQU_F	France	Pyrénées-Orientales	Montalba le château	2022	Equus caballus	Female	H. marginatum	Hap_4	1	PV051822	PV019873
987_FR66_AM1_22_EQU_M	France	Pyrénées-Orientales	Prades	2022	Equus caballus	Male	H. marginatum	Hap_17	1	PV051823	PV019874
988_FR66_AM2_22_EQU_M	France	Pyrénées-Orientales	Prades	2022	Equus caballus	Male	H. marginatum	Hap_17	1	PV051824	PV019875
989_FR66_AM3_22_EQU_F	France	Pyrénées-Orientales	Prades	2022	Equus caballus	Female	H. marginatum	Hap_4	1	PV051825	PV019876
990_FR66_AM4_22_EQU_F	France	Pyrénées-Orientales	Prades	2022	Equus caballus	Female	H. marginatum	Hap_4	1	PV051826	PV019877
991_FR66_AM5_22_EQU_F	France	Pyrénées-Orientales	Prades	2022	Equus caballus	Female	H. marginatum	Hap_4	1	PV051827	PV019878
992_FR34_C1_22_EQU_M	France	Hérault	Carlencas	2022	Equus caballus	Male	H. marginatum	Hap_47	3	PV051828	PV019879
993_FR34_C2_22_EQU_M	France	Hérault	Carlencas	2022	Equus caballus	Male	H. marginatum	Hap_19	2	PV051829	PV019880
994_FR34_C3_22_EQU_M	France	Hérault	Carlencas	2022	Equus caballus	Male	H. marginatum	Hap_47	3	PV051830	PV019881
995_FR34_C4_22_EQU_M	France	Hérault	Carlencas	2022	Equus caballus	Male	H. marginatum	Hap_17	1	PV051831	PV019882
996_FR34_C5_22_EQU_M	France	Hérault	Carlencas	2022	Equus caballus	Male	H. marginatum	Hap_19	2	PV051832	PV019883
997_FR34_D9_22_EQU_M	France	Hérault	Lunas	2022	Equus caballus	Male	H. marginatum	Hap_47	3	PV051833	PV019884
998_FR34_D10_22_EQU_M	France	Hérault	Lunas	2022	Equus caballus	Male	H. marginatum	Hap_19	2	PV051834	PV019885
999_FR34_D11_22_EQU_M	France	Hérault	Lunas	2022	Equus caballus	Male	H. marginatum	Hap_56	2	PV051835	PV019886
1000_FR34_D12_22_EQU_M	France	Hérault	Lunas	2022	Equus caballus	Male	H. marginatum	Hap_19	2	PV051836	PV019887
1001_FR34_D13_22_EQU_M	France	Hérault	Lunas	2022	Equus caballus	Male	H. marginatum	Hap_47	3	PV051837	PV019888
1002_FR30_N3_22_EQU_M	France	Gard	Saint-Côme-et-Maruéjols	2022	Equus caballus	Male	H. marginatum	Hap_45	3	PV051838	PV019889
1003_FR30_N4_22_EQU_M	France	Gard	Saint-Côme-et-Maruéjols	2022	Equus caballus	Male	H. marginatum	Hap_45	3	PV051839	PV019890
1004_FR30_N5_22_EQU_M	France	Gard	Saint-Côme-et-Maruéjols	2022	Equus caballus	Male	H. marginatum	Hap_47	3	PV051840	PV019891
1005_FR30_N6_22_EQU_M	France	Gard	Saint-Côme-et-Maruéjols	2022	Equus caballus	Male	H. marginatum	Hap_58	3	PV051841	PV019892
1006_FR30_N7_22_EQU_M	France	Gard	Saint-Côme-et-Maruéjols	2022	Equus caballus	Male	H. marginatum	Hap_47	3	PV051842	PV019893
1007_FR34_P2_22_EQU_F	France	Hérault	Notre Dame de Londres	2022	Equus caballus	Female	H. marginatum	Hap_57	3	PV051843	PV019894
1008_FR34_P3_22_EQU_F	France	Hérault	Notre Dame de Londres	2022	Equus caballus	Female	H. marginatum	Hap_47	3	PV051844	PV019895
1009_FR34_P4_22_EQU_F	France	Hérault	Notre Dame de Londres	2022	Equus caballus	Female	H. marginatum	Hap_47	3	PV051845	PV019896
1010_FR34_P5_22_EQU_F	France	Hérault	Notre Dame de Londres	2022	Equus caballus	Female	H. marginatum	Hap_47	3	PV051846	PV019897
1011_FR34_P6_22_EQU_F	France	Hérault	Notre Dame de Londres	2022	Equus caballus	Female	H. marginatum	Hap_47	3	PV051847	PV019898
1012_FR30_Pomp1_22_EQU_M	France	Gard	Pompignan	2022	Equus caballus	Male	H. marginatum	Hap_47	3	PV051848	PV019899
1013_FR30_Pomp2_22_EQU_M	France	Gard	Pompignan	2022	Equus caballus	Male	H. marginatum	Hap_57	3	PV051849	PV019900
1014_FR30_Pomp3_22_EQU_M	France	Gard	Pompignan	2022	Equus caballus	Male	H. marginatum	Hap_47	3	PV051850	PV019901
1015_FR30_Pomp4_22_EQU_M	France	Gard	Pompignan	2022	Equus caballus	Male	H. marginatum	Hap_47	3	PV051851	PV019902
1016_FR30_Pomp5_22_EQU_M	France	Gard	Pompignan	2022	Equus caballus	Male	H. marginatum	Hap_45	3	PV051852	PV019903
1017_FR30_Q13_22_EQU_M	France	Gard	Salindres	2022	Equus caballus	Male	H. marginatum	Hap_36	3	PV051853	PV019904
1018_FR30_Q14_22_EQU_M	France	Gard	Salindres	2022	Equus caballus	Male	H. marginatum	Hap_47	3	PV051854	PV019905
1020_FR30_Q16_22_EQU_M	France	Gard	Salindres	2022	Equus caballus	Male	H. marginatum	Hap_36	3	PV051855	PV019906
1021_FR30_Q17_22_EQU_M	France	Gard	Salindres	2022	Equus caballus	Male	H. marginatum	Hap_36	3	PV051856	PV019907
1023_FR34_W4_22_EQU_F	France	Hérault	Mauguio	2022	Equus caballus	Female	H. marginatum	Hap_1	1	PV051857	PV019908
1025_FR34_W6_22_EQU_F	France	Hérault	Mauguio	2022	Equus caballus	Female	H. marginatum	Hap_47	3	PV051858	PV019909
1026_FR34_W7_22_EQU_F	France	Hérault	Mauguio	2022	Equus caballus	Female	H. marginatum	Hap_17	1	PV051859	PV019910
1027_FR34_X9_22_EQU_F	France	Hérault	Cazilhac	2022	Equus caballus	Female	H. marginatum	Hap_47	3	PV051860	PV019911
1028_FR34_X10_22_EQU_F	France	Hérault	Cazilhac	2022	Equus caballus	Female	H. marginatum	Hap_47	3	PV051861	PV019912
1029_FR34_X11_22_EQU_F	France	Hérault	Cazilhac	2022	Equus caballus	Female	H. marginatum	Hap_47	3	PV051862	PV019913
1030_FR34_X12_22_EQU_F	France	Hérault	Cazilhac	2022	Equus caballus	Female	H. marginatum	Hap_47	3	PV051863	PV019914
1031_FR34_X13_22_EQU_F	France	Hérault	Cazilhac	2022	Equus caballus	Female	H. marginatum	Hap_47	3	PV051864	PV019915
1032_FR11_Z1_22_EQU_F	France	Aude	Termes	2022	Equus caballus	Female	H. marginatum	Hap_47	3	PV051865	PV019916
1033_FR11_Z2_22_EQU_F	France	Aude	Termes	2022	Equus caballus	Female	H. marginatum	Hap_47	3	PV051866	PV019917
1034_FR11_Z3_22_EQU_F	France	Aude	Termes	2022	Equus caballus	Female	H. marginatum	Hap_47	3	PV051867	PV019918
1035_FR11_Z4_22_EQU_F	France	Aude	Termes	2022	Equus caballus	Female	H. marginatum	Hap_47	3	PV051868	PV019919
1036_FR11_Z5_22_EQU_F	France	Aude	Termes	2022	Equus caballus	Female	H. marginatum	Hap_47	3	PV051869	PV019920
1037_FR34_A9_22_EQU_M	France	Hérault	Octon	2022	Equus caballus	Male	H. marginatum	Hap_47	3	PV051870	PV019921
1038_FR34_A10_22_EQU_M	France	Hérault	Octon	2022	Equus caballus	Male	H. marginatum	Hap_47	3	PV051871	PV019922
1039_FR05_5F_21_SOL_M	France	Hautes-Alpes	Ventavon	2021	Soil	Male	H. marginatum	Hap_47	3	PV051872	PV019923
1040_FR16_B8_20_EQU_M	France	Charente	Boisné-la-Tude	2020	Equus caballus	Male	H. marginatum	Hap_17	1	PV051873	PV019924
1041_FR26_4F_21_SOL_M	France	Drôme	La Baume-de-Transit	2021	Soil	Male	H. marginatum	Hap_47	3	PV051874	PV019925
1042_FR45_D8_20_EQU_F	France	Loiret	Griselles	2020	Equus caballus	Female	H. marginatum	Hap_17	1	PV051875	PV019926
1043_FR64_6F_21_SOL_M	France	Pyrénées-Atlantiques	Gan	2021	Soil	Male	H. marginatum	Hap_23	3	PV051876	PV019927
1044_ESP_D7_21_SOL_F	Spain	/	Aiguamolls	2021	Soil	Female	H. marginatum	Hap_4	1	PV051877	PV019928
1045_FR07_9F1_21_EQU_M	France	Ardèche	Le Teil	2021	Equus caballus	Male	H. marginatum	Hap_10	2	PV051878	PV019929
1046_FR07_9F2_21_EQU_M	France	Ardèche	Le Teil	2021	Equus caballus	Male	H. marginatum	Hap_36	3	PV051879	PV019930
1047_FR07_9F3_21_EQU_M	France	Ardèche	Le Teil	2021	Equus caballus	Male	H. marginatum	Hap_47	3	PV051880	PV019931
1048_FR07_9F4_21_EQU_M	France	Ardèche	Le Teil	2021	Equus caballus	Male	H. marginatum	Hap_47	3	PV051881	PV019932
1049_FR07_9F5_21_EQU_M	France	Ardèche	Le Teil	2021	Equus caballus	Male	H. marginatum	Hap_47	3	PV051882	PV019933
1050_FR34_C9_20_SOL_M	France	Hérault	Gabian	2020	Soil	Male	H. marginatum	Hap_8	3	PV051883	PV019934
1051_FR83_E2_20_SOL_F	France	Var	Le Cannet-des-Maures	2020	Soil	Female	H. marginatum	Hap_47	3	PV051884	PV019935
1052_FR83_G2_21_SOL_F	France	Var	Le Cannet-des-Maures	2021	Soil	Female	H. marginatum	Hap_23	3	PV051885	PV019936
1053_FR34_D61_21_EQU_M	France	Hérault	Pérols	2021	Equus caballus	Male	H. marginatum	Hap_47	3	PV051886	PV019937
1054_FR34_D62_21_EQU_M	France	Hérault	Pérols	2021	Equus caballus	Male	H. marginatum	Hap_47	3	PV051887	PV019938
1055_FR34_D63_21_EQU_M	France	Hérault	Pérols	2021	Equus caballus	Male	H. marginatum	Hap_36	3	PV051888	PV019939
1056_FR34_D64_21_EQU_M	France	Hérault	Pérols	2021	Equus caballus	Male	H. marginatum	Hap_47	3	PV051889	PV019940
1057_FR07_G31_20_EQU_M	France	Ardèche	Montselgues	2020	Equus caballus	Male	H. marginatum	Hap_47	3	PV051890	PV019941
1058_FR07_G32_20_EQU_F	France	Ardèche	Montselgues	2020	Equus caballus	Female	H. marginatum	Hap_47	3	PV051891	PV019942
1059_FR34_D1_20_EQU_M	France	Hérault	Mauguio	2020	Equus caballus	Male	H. marginatum	Hap_47	3	PV051892	PV019943
1060_FR30_D2_20_HOMO_F	France	Gard	Rogues	2020	Homo sapiens	Female	H. marginatum	Hap_47	3	PV051893	PV019944
1062_IT_7_16_EQU_M	Italy	Sicily	Palermo	2016	Bos taurus	Male	H. marginatum	Hap_17	1	PV051894	PV019945
1063_IT_8_16_EQU_M	Italy	Sicily	Palermo	2016	Bos taurus	Male	H. marginatum	Hap_17	1	PV051895	PV019946
1064_IT_9_16_EQU_M	Italy	Sicily	Palermo	2016	Bos taurus	Male	H. marginatum	Hap_47	3	PV051896	PV019947
1065_IT_10_16_EQU_M	Italy	Sicily	Palermo	2016	Bos taurus	Male	H. marginatum	Hap_47	3	PV051897	PV019948
1066_TN_1_20_BOS_A	Tunisia	Bizerte	Besbessia	2020	Bos taurus	Adult	H. marginatum	Hap_65	3	PV175379	PQ885461
1067_TN_2_20_BOS_A	Tunisia	Bizerte	Besbessia	2020	Bos taurus	Adult	H. marginatum	Hap_17	1	OQ263353	PQ885462
1068_TN_3_20_BOS_A	Tunisia	Bizerte	Besbessia	2020	Bos taurus	Adult	H. marginatum	Hap_17	1	PV175380	PQ885463
1069_TN_4_20_BOS_A	Tunisia	Bizerte	Besbessia	2020	Bos taurus	Adult	H. marginatum	Hap_17	1	PV175381	PQ885464
1070_TN_5_20_BOS_A	Tunisia	Bizerte	Besbessia	2020	Bos taurus	Adult	H. marginatum	Hap_47	3	PV175382	PQ885465
1072_TN_7_20_BOS_A	Tunisia	Bizerte	Ghzela	2020	Bos taurus	Adult	H. marginatum	Hap_64	3	PV175383	PQ885466
1074_TN_9_20_BOS_A	Tunisia	Bizerte	Ghzela	2020	Bos taurus	Adult	H. marginatum	Hap_4	1	PV175384	PQ885467
1075_TN_10_20_BOS_A	Tunisia	Bizerte	Ghzela	2020	Bos taurus	Adult	H. marginatum	Hap_63	1	PV175385	PQ885468
1076_TN_11_20_BOS_A	Tunisia	Jendouba	Fernena	2020	Bos taurus	Adult	H. marginatum	Hap_17	1	PV175386	PQ885469
1077_TN_12_20_BOS_A	Tunisia	Jendouba	Fernena	2020	Bos taurus	Adult	H. marginatum	Hap_17	1	PV175387	PQ885470
1078_TN_13_20_BOS_A	Tunisia	Jendouba	Fernena	2020	Bos taurus	Adult	H. marginatum	Hap_17	1	PV175388	PQ885471
1079_TN_14_20_BOS_A	Tunisia	Jendouba	Fernena	2020	Bos taurus	Adult	H. marginatum	Hap_47	3	PV175389	PQ885472
1080_TN_15_20_BOS_A	Tunisia	Jendouba	Fernena	2020	Bos taurus	Adult	H. marginatum	Hap_17	1	PV175390	PQ885473
1082_TN_17_20_BOS_A	Tunisia	Siliana	El Krib	2020	Bos taurus	Adult	H. marginatum	Hap_17	1	PV175391	PQ885474
1083_TN_18_20_BOS_A	Tunisia	Siliana	El Krib	2020	Bos taurus	Adult	H. marginatum	Hap_47	3	PV175392	PQ885475
1084_TN_19_20_BOS_A	Tunisia	Siliana	El Krib	2020	Bos taurus	Adult	H. marginatum	Hap_17	1	PV175393	PQ885476
1085_TN_20_20_BOS_A	Tunisia	Siliana	El Krib	2020	Bos taurus	Adult	H. marginatum	Hap_17	1	PV175394	PQ885477
1086_TR_1_19_BOS_F	Turkey	Tokat	Yunlu	2019	Bos taurus	Female	H. marginatum	Hap_47	3	PV051898	PV019949
1087_TR_2_23_BOS_M	Turkey	Afyonkarahisar	Kirka	2023	Bos taurus	Male	H. marginatum	Hap_47	3	PV051899	PV019950
1088_TR_3_23_S_F	Turkey	Sivas	Akoren	2023	Soil	Female	H. marginatum	Hap_47	3	PV051900	PV019951
1089_TR_4_23_S_F	Turkey	Sivas	Gokdere	2023	Soil	Female	H. marginatum	Hap_76	3	PV051901	PV019952
1091_TR_6_20_BOS_M	Turkey	Erzurum	Aydogdu	2020	Bos taurus	Male	H. marginatum	Hap_47	3	PV051902	PV019953
1092_TR_7_23_S_M	Turkey	Sivas	Sobuler	2023	Soil	Male	H. marginatum	Hap_47	3	PV051903	PV019954
1093_TR_8_23_BOS_F	Turkey	Afyonkarahisar	Kirka	2023	Bos taurus	Female	H. marginatum	Hap_77	3	PV051904	PV019955
1094_TR_9_23_S_M	Turkey	Erzincan	Bozkir	2023	Soil	Male	H. marginatum	Hap_47	3	PV051905	PV019956
1095_TR_10_23_BOS_M	Turkey	Afyonkarahisar	Kirka	2023	Bos taurus	Male	H. marginatum	Hap_47	3	PV051906	PV019957
1096_TR_11_23_S_F	Turkey	Sivas	Sobuler	2023	Soil	Female	H. marginatum	Hap_47	3	PV051907	PV019958
1097_TR_12_20_BOS_F	Turkey	Erzurum	Aydogdu	2020	Bos taurus	Female	H. marginatum	Hap_47	3	PV051908	PV019959
1098_TR_13_23_BOS_M	Turkey	Afyonkarahisar	Kirka	2023	Bos taurus	Male	H. marginatum	Hap_47	3	PV051909	PV019960
1099_TR_14_23_S_F	Turkey	Sivas	Ozen	2023	Soil	Female	H. marginatum	Hap_47	3	PV051910	PV019961
1100_TR_15_23_BOS_M	Turkey	Afyonkarahisar	Kirka	2023	Bos taurus	Male	H. marginatum	Hap_84	3	PV051911	PV019962
1101_TR_16_23_BOS_F	Turkey	Afyonkarahisar	Kirka	2023	Bos taurus	Female	H. marginatum	Hap_47	3	PV051912	PV019963
1102_TR_17_23_S_M	Turkey	Sivas	Akoren	2023	Soil	Male	H. marginatum	Hap_47	3	PV051913	PV019964
1103_TR_18_23_S_M	Turkey	Sivas	Ozen	2023	Soil	Male	H. marginatum	Hap_78	3	PV051914	PV019965
1104_TR_19_23_S_M	Turkey	Sivas	Ozen	2023	Soil	Male	H. marginatum	Hap_78	3	PV051915	PV019966
1105_TR_20_23_S_M	Turkey	Erzincan	Catkoy	2023	Soil	Male	H. marginatum	Hap_47	3	PV051916	PV019967
1106_TR_21_23_S_F	Turkey	Sivas	Ozen	2023	Soil	Female	H. marginatum	Hap_79	3	PV051917	PV019968
1107_TR_22_20_BOS_F	Turkey	Erzurum	Aydogdu	2020	Bos taurus	Female	H. marginatum	Hap_47	3	PV051918	PV019969
1108_TR_23_23_BOS_M	Turkey	Afyonkarahisar	Kirka	2023	Bos taurus	Male	H. marginatum	Hap_47	3	PV051919	PV019970
1109_TR_24_23_BOS_M	Turkey	Afyonkarahisar	Kirka	2023	Bos taurus	Male	H. marginatum	Hap_77	3	PV051920	PV019971
1111_DZ_2_18_BOS_M	Algeria	El Tarf	El Tarf	2018	Bos taurus	Male	H. marginatum	Hap_75	3	PV051921	PV019972
1112_DZ_3_18_BOS_M	Algeria	El Tarf	El Tarf	2018	Bos taurus	Male	H. marginatum	Hap_47	3	PV051922	PV019973
1113_DZ_4_18_BOS_M	Algeria	El Tarf	El Tarf	2018	Bos taurus	Male	H. marginatum	Hap_47	3	PV051923	PV019974
1115_DZ_6_18_BOS_M	Algeria	El Tarf	El Tarf	2018	Bos taurus	Male	H. marginatum	Hap_49	3	PV051924	PV019975
1116_DZ_7_18_BOS_M	Algeria	El Kala	El Kala	2018	Bos taurus	Male	H. marginatum	Hap_17	1	PV051925	PV019976
1117_DZ_8_18_BOS_M	Algeria	El Kala	El Kala	2018	Bos taurus	Male	H. marginatum	Hap_17	1	PV051926	PV019977
1118_DZ_9_18_BOS_M	Algeria	El Tarf	El Tarf	2018	Bos taurus	Male	H. marginatum	Hap_47	3	PV051927	PV019978
1120_DZ_11_18_BOS_M	Algeria	El Tarf	El Tarf	2018	Bos taurus	Male	H. marginatum	Hap_74	3	PV051928	PV019979
1121_DZ_12_18_BOS_M	Algeria	El Tarf	El Tarf	2018	Bos taurus	Male	H. marginatum	Hap_23	3	PV051929	PV019980
1122_DZ_13_18_BOS_M	Algeria	El Tarf	El Tarf	2018	Bos taurus	Male	H. marginatum	Hap_47	3	PV051930	PV019981
1123_DZ_14_19_BOS_F	Algeria	Bouhadjar	Ain El Kerma	2019	Bos taurus	Female	H. marginatum	Hap_23	3	PV051931	PV019982
1124_DZ_15_18_BOS_M	Algeria	El Kala	EL KALA	2018	Bos taurus	Male	H. marginatum	Hap_17	1	PV051932	PV019983
1125_DZ_16_18_BOS_M	Algeria	El Tarf	El Tarf	2018	Bos taurus	Male	H. marginatum	Hap_35	3	PV051933	PV019984
1126_DZ_17_18_BOS_M	Algeria	El Tarf	El Tarf	2018	Bos taurus	Male	H. marginatum	Hap_47	3	PV051934	PV019985
1128_DZ_19_18_BOS_M	Algeria	El Tarf	El Tarf	2018	Bos taurus	Male	H. marginatum	Hap_47	3	PV051935	PV019986
1129_DZ_20_18_BOS_M	Algeria	El Tarf	El Tarf	2018	Bos taurus	Male	H. marginatum	Hap_47	3	PV051936	PV019987
1130_DZ_21_18_BOS_M	Algeria	El Tarf	El Tarf	2018	Bos taurus	Male	H. marginatum	Hap_47	3	PV051937	PV019988
1133_DZ_24_18_BOS_M	Algeria	El Tarf	El Tarf	2018	Bos taurus	Male	H. marginatum	Hap_47	3	PV051938	PV019989
1134_FR30_F_20_EQU_M	France	Gard	Pompignan		Equus caballus	Male	H. marginatum	Hap_47	3	PV051939	PV019990
1135_FR30_91_23_ACR_M	France	Gard	Saint Laurent d’Aigouze	2023	Acrocephalus scirpaceus	Nymph	H. marginatum	Hap_23	3	PV051940	PV019991
1136_FR30_98_23_MOT_N	France	Gard	Le Cailar	2023	Motacilla alba	Nymph	H. marginatum	Hap_1	1	PV051941	PV019992
1137_FR30_98_23_MOT_N	France	Gard	Saint Laurent d’Aigouze	2023	Panurus biarmicus	Larvae	H. marginatum	Hap_73	3	PV051942	PV019993
1138_FR30_90_23_ACR_L	France	Gard	Saint Laurent d’Aigouze	2023	Acrocephalus scirpaceus	Larvae	H. marginatum	Hap_47	3	PV051943	PV019994
1139_FR30_90_23_ACR_N	France	Gard	Saint Laurent d’Aigouze	2023	Acrocephalus scirpaceus	Nymph	H. marginatum	Hap_47	3	PV051944	PV019995
1140_FR30_V5_23_PAS_N	France	Gard	Saint Laurent d’Aigouze	2023	Passer montanus	Nymph	H. marginatum	Hap_72	3	PV051945	PV019996
1141_FR30_V5_23_PAS_N	France	Gard	Saint Laurent d’Aigouze	2023	Passer montanus	Nymph	H. marginatum	Hap_72	3	PV051946	PV019997
1147_MA_1796_23_BOS_M	Morocco	Benslimane	Ziaida	2023	Bos taurus	Male	H. marginatum	Hap_47	3	PV051947	PV019998
1148_MA_1797_23_BOS_M	Morocco	Benslimane	Ziaida	2023	Bos taurus	Male	H. marginatum	Hap_71	3	PV051948	PV019999
1149_MA_1798_23_BOS_M	Morocco	Benslimane	Ziaida	2023	Bos taurus	Male	H. marginatum	Hap_47	3	PV051949	PV020000
1150_MA_1799_23_BOS_M	Morocco	Benslimane	Ziaida	2023	Bos taurus	Male	H. marginatum	Hap_47	3	PV051950	PV020001
1151_MA_7910_23_BOS_M	Morocco	Benslimane	Ziaida	2023	Bos taurus	Male	H. marginatum	Hap_47	3	PV051951	PV020002
1153_MA_7912_23_BOS_M	Morocco	Benslimane	Ziaida	2023	Bos taurus	Male	H. marginatum	Hap_17	1	PV051952	PV020003
1154_MA_7913_23_BOS_M	Morocco	Benslimane	Ziaida	2023	Bos taurus	Male	H. marginatum	Hap_70	2	PV051953	PV020004
1155_MA_1311_23_BOS_M	Morocco	Skhirate-Témara	Sidi Yahya Zaër	2023	Bos taurus	Male	H. marginatum	Hap_47	3	PV051954	PV020005
1156_MA_1312_23_BOS_M	Morocco	Skhirate-Témara	Sidi Yahya Zaër	2023	Bos taurus	Male	H. marginatum	Hap_47	3	PV051955	PV020006
1157_MA_1313_23_BOS_M	Morocco	Skhirate-Témara	Sidi Yahya Zaër	2023	Bos taurus	Male	H. marginatum	Hap_47	3	PV051956	PV020007
1158_MA_1314_23_BOS_M	Morocco	Skhirate-Témara	Sidi Yahya Zaër	2023	Bos taurus	Male	H. marginatum	Hap_69	3	PV051957	PV020008
1159_MA_1315_23_BOS_M	Morocco	Skhirate-Témara	Sidi Yahya Zaër	2023	Bos taurus	Male	H. marginatum	Hap_31	3	PV051958	PV020009
1160_MA_1316_23_BOS_M	Morocco	Skhirate-Témara	Sidi Yahya Zaër	2023	Bos taurus	Male	H. marginatum	Hap_56	2	PV051959	PV020010
1161_MA_1317_23_BOS_M	Morocco	Skhirate-Témara	Sidi Yahya Zaër	2023	Bos taurus	Male	H. marginatum	Hap_17	1	PV051960	PV020011
1162_MA_1318_23_BOS_M	Morocco	Skhirate-Témara	Sidi Yahya Zaër	2023	Bos taurus	Male	H. marginatum	Hap_69	3	PV051961	PV020012
1163_MA_1319_23_BOS_M	Morocco	Skhirate-Témara	Sidi Yahya Zaër	2023	Bos taurus	Male	H. marginatum	Hap_56	2	PV051962	PV020013
1164_MA_3110_23_BOS_M	Morocco	Skhirate-Témara	Sidi Yahya Zaër	2023	Bos taurus	Male	H. marginatum	Hap_47	3	PV051963	PV020014
1165_MA_3111_23_BOS_M	Morocco	Skhirate-Témara	Sidi Yahya Zaër	2023	Bos taurus	Male	H. marginatum	Hap_80	3	PV051964	PV020015
1166_MA_3112_23_BOS_M	Morocco	Skhirate-Témara	Sidi Yahya Zaër	2023	Bos taurus	Male	H. marginatum	Hap_47	3	PV051965	PV020016
1167_MA_222_23_BOS_M	Morocco	Khemisset	Sidi Boukhalkhal	2023	Bos taurus	Male	H. marginatum	Hap_47	3	PV051966	PV020017
1170_MA_2352_23_BOS_F	Morocco	Benslimane	Cherrat	2023	Bos taurus	Female	H. marginatum	Hap_71	3	PV051967	PV020018
1171_MA_1681_23_BOS_M	Morocco	Khemisset	Sidi Boukhalkhal	2023	Bos taurus	Male	H. marginatum	Hap_47	3	PV051968	PV020019
1172_MA_1682_23_BOS_M	Morocco	Khemisset	Sidi Boukhalkhal	2023	Bos taurus	Male	H. marginatum	Hap_47	3	PV051969	PV020020
1173_MA_1641_23_BOS_F	Morocco	Khemisset	Sidi Boukhalkhal	2023	Bos taurus	Male	H. marginatum	Hap_47	3	PV051970	PV020021
1174_MA_1642_23_BOS_M	Morocco	Khemisset	Sidi Boukhalkhal	2023	Bos taurus	Male	H. marginatum	Hap_47	3	PV051971	PV020022
1175_MA_1643_23_BOS_M	Morocco	Khemisset	Sidi Boukhalkhal	2023	Bos taurus	Male	H. marginatum	Hap_47	3	PV051972	PV020023
1176_MA_2341_23_BOS_M	Morocco	Benslimane	Cherrat	2023	Bos taurus	Male	H. marginatum	Hap_67	3	PV051973	PV020024
1177_MA_2342_23_BOS_M	Morocco	Benslimane	Cherrat	2023	Bos taurus	Male	H. marginatum	Hap_17	1	PV051974	PV020025
1178_MA_2343_23_BOS_M	Morocco	Benslimane	Cherrat	2023	Bos taurus	Male	H. marginatum	Hap_47	3	PV051975	PV020026
1179_MA_2344_23_BOS_M	Morocco	Benslimane	Cherrat	2023	Bos taurus	Male	H. marginatum	Hap_68	3	PV051976	PV020027
1180_MA_2345_23_BOS_M	Morocco	Benslimane	Cherrat	2023	Bos taurus	Male	H. marginatum	Hap_19	2	PV051977	PV020028
1181_MA_2346_23_BOS_M	Morocco	Benslimane	Cherrat	2023	Bos taurus	Male	H. marginatum	Hap_45	3	PV051978	PV020029
1182_MA_2347_23_BOS_M	Morocco	Benslimane	Cherrat	2023	Bos taurus	Male	H. marginatum	Hap_67	3	PV051979	PV020030
1183_MA_2348_23_BOS_M	Morocco	Benslimane	Cherrat	2023	Bos taurus	Male	H. marginatum	Hap_81	3	PV051980	PV020031
1184_MA_2349_23_BOS_M	Morocco	Benslimane	Cherrat	2023	Bos taurus	Male	H. marginatum	Hap_47	3	PV051981	PV020032
1186_MA_3411_23_BOS_M	Morocco	Benslimane	Cherrat	2023	Bos taurus	Male	H. marginatum	Hap_36	3	PV051982	PV020033
1187_MA_3412_23_BOS_M	Morocco	Benslimane	Cherrat	2023	Bos taurus	Male	H. marginatum	Hap_47	3	PV051983	PV020034
1188_RO_7_23_BOS_M	Romania	Tulcea	Chilia Veche	2023	Bos taurus	Male	H. marginatum	Hap_47	3	PV051984	PV020035
1189_RO_8_23_BOS_M	Romania	Tulcea	Chilia Veche	2023	Bos taurus	Male	H. marginatum	Hap_47	3	PV051985	PV020036
1190_RO_9_23_BOS_M	Romania	Tulcea	Chilia Veche	2023	Bos taurus	Male	H. marginatum	Hap_47	3	PV051986	PV020037
1191_RO_10_23_BOS_M	Romania	Tulcea	Chilia Veche	2023	Bos taurus	Male	H. marginatum	Hap_47	3	PV051987	PV020038
1192_RO_11_23_BOS_M	Romania	Tulcea	Chilia Veche	2023	Bos taurus	Male	H. marginatum	Hap_47	3	PV051988	PV020039
1193_RO_12_23_BOS_M	Romania	Tulcea	Chilia Veche	2023	Bos taurus	Male	H. marginatum	Hap_47	3	PV051989	PV020040
1195_FR21_1741_22_EQU_M	France	Côte-d'Or	Arnay sous Vitteaux	2022	Equus caballus	Male	H. marginatum	Hap_17	1	PV051990	PV020041
1196_FR45_1835_22_EQU_F	France	Loiret	Poilly lez Gien	2022	Equus caballus	Female	H. marginatum	Hap_47	3	PV051991	PV020042
1197_FR74_2112_21_EQU_M	France	Haute-Savoie	Armoy	2021	Equus caballus	Male	H. marginatum	Hap_47	3	PV051992	PV020043
1198_FR04_2115_21_EQU_F	France	Alpes de Haute-Provence	Valensole	2021	Equus caballus	Female	H. marginatum	Hap_47	3	PV051993	PV020044
1199_FR07_495_23_EQU_F	France	Ardèche	Saint-Michel-de-Chabrillanoux	2023	Equus caballus	Female	H. marginatum	Hap_36	3	PV051994	PV020045
1200_FR83_1011_20_EQU_M	France	Var	Sainte Maxime	2020	Equus caballus	Male	H. marginatum	Hap_47	3	PV051995	PV020046
1201_FR83_102_20_EQU_M	France	Var	Sainte Maxime	2020	Equus caballus	Male	H. marginatum	Hap_47	3	PV051996	PV020047
1202_FR83_811_21_EQU_F	France	Var	Sainte Maxime	2021	Equus caballus	Female	H. marginatum	Hap_47	3	PV051997	PV020048
1203_FR83_812_21_EQU_F	France	Var	Sainte Maxime	2021	Equus caballus	Female	H. marginatum	Hap_19	2	PV051998	PV020049
1204_FR83_813_21_EQU_M	France	Var	Sainte Maxime	2021	Equus caballus	Male	H. marginatum	Hap_19	2	PV051999	PV020050
1205_FR83_814_21_EQU_F	France	Var	Sainte Maxime	2021	Equus caballus	Female	H. marginatum	Hap_47	3	PV052000	PV020051
1206_FR83_815_21_EQU_M	France	Var	Sainte Maxime	2021	Equus caballus	Male	H. marginatum	Hap_19	2	PV052001	PV020052
1207_FR26_2377_22_EQU_F	France	Drôme	Bézaudun sur bine	2022	Equus caballus	Female	H. marginatum	Hap_45	3	PV052002	PV020053
1208_FR48_1611_23_EQU_M	France	Lozère	Le malzieu forain	2023	Equus caballus	Male	H. marginatum	Hap_47	3	PV052003	PV020054
1209_FR48_1612_23_EQU_F	France	Lozère	Le malzieu forain	2023	Equus caballus	Female	H. marginatum	Hap_47	3	PV052004	PV020055
1210_FR11_581_22_EQU_M	France	Aude	Villeneuve la Comptal	2022	Equus caballus	Male	H. marginatum	Hap_17	1	PV052005	PV020056
1211_FR11_582_22_EQU_F	France	Aude	Villeneuve la Comptal	2022	Equus caballus	Female	H. marginatum	Hap_47	3	PV052006	PV020057
1212_FR64_2733_21_EQU_F	France	Pyrénées-Atlantiques	Anoye	2021	Equus caballus	Female	H. marginatum	Hap_13	1	PV052007	PV020058
1213_FR2A_2841_21_EQU_M	France	Corse-du-Sud	Bilia	2021	Equus caballus	Male	H. marginatum	Hap_41	3	PV052008	PV020059
1214_FR2A_141_21_EQU_F	France	Corse-du-Sud	Bilia	2021	Equus caballus	Female	H. marginatum	Hap_17	1	PV052009	PV020060
1215_FR2A_142_21_EQU_M	France	Corse-du-Sud	Bilia	2021	Equus caballus	Male	H. marginatum	Hap_47	3	PV052010	PV020061
1216_FR2A_2842_21_EQU_M	France	Corse-du-Sud	Bilia	2021	Equus caballus	Male	H. marginatum	Hap_47	3	PV052011	PV020062
1217_FR2A_2843_21_EQU_M	France	Corse-du-Sud	Bilia	2021	Equus caballus	Male	H. marginatum	Hap_83	3	PV052012	PV020063
1218_FR2A_2844_21_EQU_F	France	Corse-du-Sud	Bilia	2021	Equus caballus	Female	H. marginatum	Hap_83	3	PV052013	PV020064
1219_FR26_961_21_EQU_M	France	Drôme	Grane	2021	Equus caballus	Male	H. marginatum	Hap_45	3	PV052014	PV020065
1220_FR26_962_21_EQU_M	France	Drôme	Grane	2021	Equus caballus	Male	H. marginatum	Hap_45	3	PV052015	PV020066
1221_FR26_963_21_EQU_F	France	Drôme	Grane	2021	Equus caballus	Female	H. marginatum	Hap_45	3	PV052016	PV020067
1222_FR26_964_21_EQU_M	France	Drôme	Grane	2021	Equus caballus	Male	H. marginatum	Hap_45	3	PV052017	PV020068
1223_FR26_965_21_EQU_M	France	Drôme	Grane	2021	Equus caballus	Male	H. marginatum	Hap_45	3	PV052018	PV020069
1224_FR26_966_21_EQU_M	France	Drôme	Grane	2021	Equus caballus	Male	H. marginatum	Hap_45	3	PV052019	PV020070
1225_FR07_131_23_EQU_F	France	Ardèche	Saint Maurice d'Ardèche	2023	Equus caballus	Female	H. marginatum	Hap_45	3	PV052020	PV020071
1226_FR07_132_23_EQU_M	France	Ardèche	Saint Maurice d'Ardèche	2023	Equus caballus	Male	H. marginatum	Hap_47	3	PV052021	PV020072
1227_FR11_6131_22_EQU_F	France	Aude	Laurac	2022	Equus caballus	Female	H. marginatum	Hap_17	1	PV052022	PV020073
1228_FR33_7672_22_EQU_F	France	Gironde	St Louis de Montferrand	2022	Equus caballus	Male	H. marginatum	Hap_47	3	PV052023	PV020074
1229_FR26_8175_22_EQU_F	France	Drôme	Valence	2022	Equus caballus	Female	H. marginatum	Hap_87	1	PV052024	PV020075
1230_IL_20_14_EQU_M	Israel	Haifa	Beit Oren	2014	Equus caballus	Male	H. marginatum	Hap_47	3	PV052025	PV020076
1231_IL_22_14_EQU_M	Israel	Haifa	Beit Oren	2014	Equus caballus	Male	H. marginatum	Hap_47	3	PV052026	PV020077
1232_IL_23_14_EQU_M	Israel	Haifa	Beit Oren	2014	Equus caballus	Male	H. marginatum	Hap_85	3	PV052027	PV020078
1234_IL_28_14_EQU_M	Israel	Haifa	Beit Oren	2014	Equus caballus	Male	H. marginatum	Hap_47	3	PV052028	PV020079
1235_IL_88_15_EQU_M	Israel	Haifa	Beit Oren	2015	Equus caballus	Male	H. marginatum	Hap_47	3	PV052029	PV020080
1236_IL_98_15_EQU_M	Israel	Haifa	Beit Oren	2015	Equus caballus	Female	H. marginatum	Hap_47	3	PV052030	PV020081
1237_IL_102_15_EQU_F	Israel	Haifa	Beit Oren	2015	Equus caballus	Female	H. marginatum	Hap_47	3	PV052031	PV020082
1238_IL_113_15_EQU_F	Israel	Haifa	Beit Oren	2015	Equus caballus	Female	H. marginatum	Hap_47	3	PV052032	PV020083
1240_IL_1221_15_EQU_M	Israel	Haifa	Beit Oren	2015	Equus caballus	Male	H. marginatum	Hap_86	3	PV052033	PV020084
1241_IL_134_15_EQU_M	Israel	Haifa	Beit Oren	2015	Equus caballus	Male	H. marginatum	Hap_77	3	PV052034	PV020085
1242_IL_136_15_EQU_F	Israel	Haifa	Beit Oren	2015	Equus caballus	Female	H. marginatum	Hap_47	3	PV052035	PV020086
1244_IL_146_15_EQU_M	Israel	Haifa	Beit Oren	2015	Equus caballus	Male	H. marginatum	Hap_23	3	PV052036	PV020087
1245_IL_171_15_EQU_M	Israel	Haifa	Beit Oren	2015	Equus caballus	Male	H. marginatum	Hap_84	3	PV052037	PV020088
1246_IL_184_15_EQU_F	Israel	Haifa	Beit Oren	2015	Equus caballus	Female	H. marginatum	Hap_47	3	PV052038	PV020089
1247_IL_185_15_EQU_F	Israel	Haifa	Beit Oren	2015	Equus caballus	Female	H. marginatum	Hap_81	3	PV052039	PV020090
1248_IL_186_15_EQU_M	Israel	Haifa	Beit Oren	2015	Equus caballus	Male	H. marginatum	Hap_23	3	PV052040	PV020091
1249_IL_195_15_EQU_F	Israel	Haifa	Beit Oren	2015	Equus caballus	Female	H. marginatum	Hap_47	3	PV052041	PV020092
1250_IL_197_15_EQU_M	Israel	Haifa	Beit Oren	2015	Equus caballus	Male	H. marginatum	Hap_9	3	PV052042	PV020093
1251_IL_205_15_EQU_F	Israel	Haifa	Beit Oren	2015	Equus caballus	Female	H. marginatum	Hap_47	3	PV052043	PV020094
1252_IL_207_15_EQU_F	Israel	Haifa	Beit Oren	2015	Equus caballus	Female	H. marginatum	Hap_47	3	PV052044	PV020095
1253_IL_216_15_EQU_M	Israel	Haifa	Beit Oren	2015	Equus caballus	Male	H. marginatum	Hap_47	3	PV052045	PV020096
1254_ES_1_23_S_A	Spain	Baix Ebre	Roquetes	2023	Soil	Adult	H. marginatum	Hap_47	3	PV052046	PV020097
1255_ES_3_23_S_A	Spain	Baix Ebre	Roquetes	2023	Soil	Adult	H. marginatum	Hap_17	1	PV052047	PV020098
1256_ES_4_23_S_A	Spain	Baix Ebre	Roquetes	2023	Soil	Adult	H. marginatum	Hap_47	3	PV052048	PV020099
1257_ES_6_23_S_A	Spain	Baix Ebre	Roquetes	2023	Soil	Adult	H. marginatum	Hap_47	3	PV052049	PV020100
1258_ES_7_23_SUS_A	Spain	Baix Ebre	Roquetes	2023	Sus scrofa	Adult	H. marginatum	Hap_6	2	PV052050	PV020101
1259_ES_8_23_SUS_A	Spain	Baix Ebre	Roquetes	2023	Sus scrofa	Adult	H. marginatum	Hap_47	3	PV052051	PV020102
1260_ES_9_23_SUS_A	Spain	Baix Ebre	Roquetes	2023	Sus scrofa	Adult	H. marginatum	Hap_82	3	PV052052	PV020103
1261_ES_10_23_SUS_A	Spain	Baix Ebre	Roquetes	2023	Sus scrofa	Adult	H. marginatum	Hap_47	3	PV052053	PV020104
1262_ES_11_23_SUS_A	Spain	Baix Ebre	Roquetes	2023	Sus scrofa	Adult	H. marginatum	Hap_47	3	PV052054	PV020105
1263_ES_12_23_SUS_A	Spain	Baix Ebre	Roquetes	2023	Sus scrofa	Adult	H. marginatum	Hap_47	3	PV052055	PV020106
1264_ES_13_23_SUS_A	Spain	Baix Ebre	Roquetes	2023	Sus scrofa	Adult	H. marginatum	Hap_47	3	PV052056	PV020107
1265_ES_14_23_SUS_A	Spain	Baix Ebre	Roquetes	2023	Sus scrofa	Adult	H. marginatum	Hap_47	3	PV052057	PV020108
1266_ES_15_23_SUS_A	Spain	Baix Ebre	Roquetes	2023	Sus scrofa	Adult	H. marginatum	Hap_35	3	PV052058	PV020109
1267_ES_16_23_SUS_A	Spain	Baix Ebre	Roquetes	2023	Sus scrofa	Adult	H. marginatum	Hap_6	2	PV052059	PV020110
1268_ES_17_23_SUS_A	Spain	Baix Ebre	Roquetes	2023	Sus scrofa	Adult	H. marginatum	Hap_47	3	PV052060	PV020111
1269_ES_18_23_SUS_A	Spain	Baix Ebre	Roquetes	2023	Sus scrofa	Adult	H. marginatum	Hap_17	1	PV052061	PV020112
1270_ES_19_23_SUS_A	Spain	Baix Ebre	Roquetes	2023	Sus scrofa	Adult	H. marginatum	Hap_6	2	PV052062	PV020113
1271_ES_20_23_SUS_A	Spain	Baix Ebre	Roquetes	2023	Sus scrofa	Adult	H. marginatum	Hap_47	3	PV052063	PV020114
1272_ES_21_23_SUS_A	Spain	Baix Ebre	Roquetes	2023	Sus scrofa	Adult	H. marginatum	Hap_47	3	PV052064	PV020115
1273_ES_22_23_SUS_A	Spain	Alt Empordà	Peralada i Mollet	2023	Sus scrofa	Adult	H. marginatum	Hap_12	1	PV052065	PV020116
1275_ES_24_23_SUS_A	Spain	Baix Ebre	Roquetes	2023	Sus scrofa	Adult	H. marginatum	Hap_47	3	PV052066	PV020117
1276_ES_25_23_SUS_A	Spain	Baix Ebre	Roquetes	2023	Sus scrofa	Adult	H. marginatum	Hap_47	3	PV052067	PV020118
1277_ES_26_23_SUS_A	Spain	Gironès	Llagostera	2023	Sus scrofa	Adult	H. marginatum	Hap_47	3	PV052068	PV020119
1278_ES_27_23_SUS_A	Spain	Alt Empordà	Vilanova de la Muga	2023	Sus scrofa	Adult	H. marginatum	Hap_17	1	PV052069	PV020120
1279_ES_28_23_SUS_A	Spain	Baix Ebre	Roquetes	2023	Sus scrofa	Adult	H. marginatum	Hap_17	1	PV052070	PV020121
1280_ES_29_23_SUS_A	Spain	Baix Ebre	Roquetes	2023	Sus scrofa	Adult	H. marginatum	Hap_47	3	PV052071	PV020122
1281_ES_30_23_SUS_A	Spain	Baix Ebre	Roquetes	2023	Sus scrofa	Adult	H. marginatum	Hap_47	3	PV052072	PV020123
1282_ES_31_23_SUS_A	Spain	Baix Ebre	Roquetes	2023	Sus scrofa	Adult	H. marginatum	Hap_23	3	PV052073	PV020124
1283_ES_32_23_SUS_A	Spain	Baix Ebre	Roquetes	2023	Sus scrofa	Adult	H. marginatum	Hap_6	2	PV052074	PV020125
1284_ES_33_23_SUS_A	Spain	Baix Ebre	Roquetes	2023	Sus scrofa	Adult	H. marginatum	Hap_6	2	PV052075	PV020126
1285_ES_34_23_SUS_A	Spain	Baix Ebre	Roquetes	2023	Sus scrofa	Adult	H. marginatum	Hap_6	2	PV052076	PV020127
1286_ES_35_23_SUS_A	Spain	Baix Ebre	Roquetes	2023	Sus scrofa	Adult	H. marginatum	Hap_47	3	PV052077	PV020128
1287_ES_36_23_SUS_A	Spain	Baix Ebre	Roquetes	2023	Sus scrofa	Adult	H. marginatum	Hap_47	3	PV052078	PV020129
1288_ES_37_23_SUS_A	Spain	Baix Ebre	Roquetes	2023	Sus scrofa	Adult	H. marginatum	Hap_6	2	PV052079	PV020130
1289_ES_38_23_SUS_A	Spain	Baix Ebre	Roquetes	2023	Sus scrofa	Adult	H. marginatum	Hap_47	3	PV052080	PV020131
1290_ES_39_23_SUS_A	Spain	Baix Ebre	Roquetes	2023	Sus scrofa	Adult	H. marginatum	Hap_47	3	PV052081	PV020132
1291_ES_40_23_SUS_A	Spain	Baix Ebre	Roquetes	2023	Sus scrofa	Adult	H. marginatum	Hap_47	3	PV052082	PV020133
1292_ES_41_23_SUS_A	Spain	Baix Ebre	Roquetes	2023	Sus scrofa	Adult	H. marginatum	Hap_47	3	PV052083	PV020134
1293_ES_42_23_SUS_A	Spain	Baix Ebre	Roquetes	2023	Sus scrofa	Adult	H. marginatum	Hap_17	1	PV052084	PV020135
1294_ES_43_23_SUS_A	Spain	Baix Ebre	Roquetes	2023	Sus scrofa	Adult	H. marginatum	Hap_47	3	PV052085	PV020136
1295_ES_44_23_SUS_A	Spain	Baix Ebre	Roquetes	2023	Sus scrofa	Adult	H. marginatum	Hap_47	3	PV052086	PV020137
1296_ES_46_23_SUS_A	Spain	Baix Ebre	Roquetes	2023	Sus scrofa	Adult	H. marginatum	Hap_47	3	PV052087	PV020138
1297_ES_47_23_SUS_A	Spain	Baix Ebre	Roquetes	2023	Sus scrofa	Adult	H. marginatum	Hap_47	3	PV052088	PV020139
1298_ES_48_23_SUS_A	Spain	Baix Ebre	Roquetes	2023	Sus scrofa	Adult	H. marginatum	Hap_47	3	PV052089	PV020140
1299_ES_49_23_SUS_A	Spain	Baix Ebre	Roquetes	2023	Sus scrofa	Adult	H. marginatum	Hap_47	3	PV052090	PV020141
1300_ES_50_23_SUS_A	Spain	Baix Ebre	Roquetes	2023	Sus scrofa	Adult	H. marginatum	Hap_47	3	PV052091	PV020142
1301_ES_51_23_S_A	Spain	Ports	Morella	2023	Ovis aries	Adult	H. marginatum	Hap_47	3	PV052092	PV020143
1302_ES_52_23_S_A	Spain	Alt Maestrat	Ares del Maestrat	2023	Bos taurus	Adult	H. marginatum	Hap_36	3	PV052093	PV020144
1303_ES_53_23_S_A	Spain	Alt Empordà	Castelló d'Empúries	2024	Equus caballus	Adult	H. marginatum	Hap_47	3	PV052094	PV020145
1304_ES_54_23_S_A	Spain	Bages	Sant Mateu de Bages	2024	Sus scrofa	Adult	H. marginatum	Hap_47	3	PV052095	PV020146
1305_ES_55_23_S_A	Spain	Bages	Sant Mateu de Bages	2024	Sus scrofa	Adult	H. marginatum	Hap_47	3	PV052096	PV020147
1306_ES_56_23_S_A	Spain	Bages	Sant Mateu de Bages	2024	Sus scrofa	Adult	H. marginatum	Hap_47	3	PV052097	PV020148
1307_ES_57_23_S_A	Spain	Bages	Sant Mateu de Bages	2024	Sus scrofa	Adult	H. marginatum	Hap_47	3	PV052098	PV020149
1308_ES_58_23_S_A	Spain	Bages	Sant Mateu de Bages	2024	Sus scrofa	Adult	H. marginatum	Hap_47	3	PV052099	PV020150
1309_ES_59_23_S_A	Spain	Bages	Sant Mateu de Bages	2024	Sus scrofa	Adult	H. marginatum	Hap_47	3	PV052100	PV020151
1310_ES_60_23_S_A	Spain	Bages	Sant Mateu de Bages	2024	Sus scrofa	Adult	H. marginatum	Hap_47	3	PV052101	PV020152
1311_ES_61_23_BOS_A	Spain	Baix Ebre	Roquetes	2024	Bos taurus	Adult	H. marginatum	Hap_82	3	PV052102	PV020153
1312_ES_62_23_BOS_A	Spain	Baix Ebre	Roquetes	2024	Bos taurus	Adult	H. marginatum	Hap_6	2	PV052103	PV020154
1313_ES_63_23_BOS_A	Spain	Baix Ebre	Roquetes	2024	Bos taurus	Adult	H. marginatum	Hap_47	3	PV052104	PV020155
1314_ES_64_23_BOS_A	Spain	Baix Ebre	Roquetes	2024	Bos taurus	Adult	H. marginatum	Hap_47	3	PV052105	PV020156
1315_ES_65_23_BOS_A	Spain	Baix Ebre	Roquetes	2024	Bos taurus	Adult	H. marginatum	Hap_23	3	PV052106	PV020157
1316_ES_66_23_BOS_A	Spain	Baix Ebre	Roquetes	2024	Bos taurus	Adult	H. marginatum	Hap_47	3	PV052107	PV020158
1317_ES_67_23_BOS_A	Spain	Baix Ebre	Roquetes	2024	Bos taurus	Adult	H. marginatum	Hap_23	3	PV052108	PV020159
1318_ES_68_23_BOS_A	Spain	Baix Ebre	Roquetes	2024	Bos taurus	Adult	H. marginatum	Hap_47	3	PV052109	PV020160
1319_ES_69_23_BOS_A	Spain	Baix Ebre	Roquetes	2024	Bos taurus	Adult	H. marginatum	Hap_47	3	PV052110	PV020161
1320_ES_70_23_BOS_A	Spain	Baix Ebre	Roquetes	2024	Bos taurus	Adult	H. marginatum	Hap_47	3	PV052111	PV020162
1321_ES_71_23_BOS_A	Spain	Baix Ebre	Roquetes	2024	Bos taurus	Adult	H. marginatum	Hap_47	3	PV052112	PV020163
1322_ES_72_23_BOS_A	Spain	Baix Ebre	Roquetes	2024	Bos taurus	Adult	H. marginatum	Hap_47	3	PV052113	PV020164
1323_ES_73_23_BOS_A	Spain	Baix Ebre	Roquetes	2024	Bos taurus	Adult	H. marginatum	Hap_6	2	PV052114	PV020165
1325_ES_75_23_BOS_A	Spain	Baix Ebre	Roquetes	2024	Bos taurus	Adult	H. marginatum	Hap_47	3	PV052115	PV020166
1335_FR30_R6_22_EQU_M	France	Gard	Rodilhan	2022	Equus caballus	Male	H. marginatum	Hap_47	3	PV052116	PV020167
1336_FR30_R7_22_EQU_M	France	Gard	Rodilhan	2022	Equus caballus	Male	H. marginatum	Hap_47	3	PV052117	PV020168
1337_FR30_R8_22_EQU_M	France	Gard	Rodilhan	2022	Equus caballus	Male	H. marginatum	Hap_47	3	PV052118	PV020169
1338_FR30_R9_22_EQU_M	France	Gard	Rodilhan	2022	Equus caballus	Male	H. marginatum	Hap_47	3	PV052119	PV020170
1339_FR30_R10_22_EQU_M	France	Gard	Rodilhan	2022	Equus caballus	Male	H. marginatum	Hap_47	3	PV052120	PV020171
1340_FR34_W3_22_EQU_F	France	Hérault	Mauguio	2022	Equus caballus	Female	H. marginatum	Hap_19	2	PV052121	PV020172
1341_MA_3413_23_BOS_M	Morocco	Benslimane	Cherrat	2023	Bos taurus	Male	H. marginatum	Hap_71		PV052122	PV020173
1343_MA_2012_23_BOS_M	Morocco	Khemisset	Sidi Boukhalkhal	2023	Bos taurus	Male	H. marginatum	Hap_47	3	PV052123	PV020174
1344_MA_2013_23_BOS_M	Morocco	Khemisset	Sidi Boukhalkhal	2023	Bos taurus	Male	H. marginatum	Hap_59	1	PV052124	PV020175
1345_ES_9_19_EQU_F	Spain	Andalusia	Doñana	2019	Equus caballus	Female	H. marginatum	Hap_31	3	PV052125	PV020176
1346_ES_10_19_EQU_F	Spain	Andalusia	Doñana	2019	Equus caballus	Female	H. marginatum	Hap_47	3	PV052126	PV020177
1347_RO_1_23_BOS_M	Romania	Tulcea	Chilia Veche	2023	Bos taurus	Male	H. marginatum	Hap_47	3	PV052127	PV020178
1348_RO_2_23_BOS_M	Romania	Tulcea	Chilia Veche	2023	Bos taurus	Male	H. marginatum	Hap_47	3	PV052128	PV020179
1349_RO_3_23_BOS_M	Romania	Tulcea	Chilia Veche	2023	Bos taurus	Male	H. marginatum	Hap_47	3	PV052129	PV020180
1351_RO_5_23_BOS_M	Romania	Tulcea	Chilia Veche	2023	Bos taurus	Male	H. marginatum	Hap_47	3	PV052130	PV020181
1352_RO_6_23_BOS_F	Romania	Tulcea	Chilia Veche	2023	Bos taurus	Female	H. marginatum	Hap_47	3	PV052131	PV020182
1353_ES_7_19_EQU_F	Spain	Andalusia	Doñana	2019	Equus caballus	Female	H. marginatum	Hap_31	3	PV052132	PV020183
2008_Wetland_Little_Camargue_166	France	Hérault	Lansargues	2008	Equus caballus	Female	H. marginatum	Hap_5	1	KX000628	KX000647
2008_Wetland_Little_Camargue_19	France	Gard	St Laurent aigouze	2008	Equus caballus	Female	H. marginatum	Hap_47	3	KX000626	KX000650
2008_Wetland_Little_Camargue_20	France	Gard	St Laurent aigouze	2008	Equus caballus	Female	H. marginatum	Hap_5	1	KX000627	KX000649
2010_Wetland_Little_Camargue_F12	France	Gard	Aigues-Mortes	2010	Equus caballus	Female	H. marginatum	Hap_17	1	KX000629	KX000644
2012_Wetland_Estagnol_NN1	France	Hérault	Villeneuve-lès-Maguelone	2012	Erithacus rubecula	Nymph	H. marginatum	Hap_45	3	KX000624	KX000640
2012_Wetland_Estagnol_NN4	France	Hérault	Villeneuve-lès-Maguelone	2012	Erithacus rubecula	Nymph	H. marginatum	Hap_47	3	KX000622	KX000633
2013_Estagnol_NN5	France	Hérault	Villeneuve-lès-Maguelone	2013	Erithacus rubecula	Nymph	H. marginatum	Hap_59	1	KX000620	KX000639
2013_Estagnol_NN6	France	Hérault	Villeneuve-lès-Maguelone	2013	Erithacus rubecula	Nymph	H. marginatum	Hap_59	1	KX000612	KX000636
2015_Wetland_Little_Camargue_F41	France	Gard	Aigues-Mortes	2015	Equus caballus	Female	H. marginatum	Hap_47	3	KX000619	KX000634
2015_Wetland_Little_Camargue_F48	France	Gard	Grau du roi	2015	Equus caballus	Female	H. marginatum	Hap_60	3	KX000621	KX000632
2015_Wetland_Little_Camargue_F53	France	Gard	Aigues-Mortes	2015	Equus caballus	Female	H. marginatum	Hap_47	3	KX000623	KX000637
2015_Wetland_Little_Camargue_F56	France	Gard	Aigues-Mortes	2015	Equus caballus	Female	H. marginatum	Hap_47	3	KX000625	KX000642
2015_Wetland_Little_Camargue_M36	France	Gard	Aigues-Mortes	2015	Equus caballus	Male	H. marginatum	Hap_1	1	KX000616	KX000648
2015_Wetland_Little_Camargue_M42	France	Gard	Aigues-Mortes	2015	Equus caballus	Male	H. marginatum	Hap_47	3	KX000617	KX000646
2015_Wetland_Little_Camargue_M43	France	Gard	Aigues-Mortes	2015	Equus caballus	Male	H. marginatum	Hap_47	3	KX000615	KX000645
2015_Wetland_Little_Camargue_M55	France	Gard	Aigues-Mortes	2015	Equus caballus	Male	H. marginatum	Hap_47	3	KX000609	KX000635
MN885800	Turkey	/	/	/	/	/	H. marginatum	Hap_47	3	MN885800	MN885800
MT270686	Turkey	/	/	/	/	/	H. marginatum	Hap_47	3	MT270686	MT270686
MT270687	Turkey	/	/	/	/	/	H. marginatum	Hap_25	3	MT270687	MT270687
MT270688	Turkey	/	/	/	/	/	H. marginatum	Hap_47	3	MT270688	MT270688
MW366628	Turkey	/	/	/	/	/	H. marginatum	Hap_47	3	MW366628	MW366628
MW366629	Turkey	/	/	/	/	/	H. marginatum	Hap_21	3	MW366629	MW366629
MW366630	Turkey	/	/	/	/	/	H. marginatum	Hap_47	3	MW366630	MW366630
MW366631	Turkey	/	/	/	/	/	H. marginatum	Hap_47	3	MW366631	MW366631
MW366632	Turkey	/	/	/	/	/	H. marginatum	Hap_47	3	MW366632	MW366632
MW366633	Turkey	/	/	/	/	/	H. marginatum	Hap_47	3	MW366633	MW366633
NC_056189	Turkey	/	/	/	/	/	H. marginatum	Hap_47	3	NC_056189	NC_056189
1110_DZ_1_18_ERI_M	Algeria	Bouhadjar	Ain El Kerma	2018	Atelerix algirus	Male	H. excavatum			PQ899448
1132_DZ_23_18_BOS_M	Algeria	El Kala	El Kala	2018	Bos taurus	Male	H. excavatum			PQ899449
1152_MA_7911_23_BOS_M	Morocco	Benslimane	Ziaida	2023	Bos taurus	Male	H. excavatum				PQ899169
925_ES_27M_22_Bos_M	Spain	Castille-et-León	Segovie	2022	Bos taurus	Male	H. lusitanicum			PQ900077
926_ES_27M_22_Bos_M	Spain	Castille-et-León	Segovie	2022	Bos taurus	Male	H. lusitanicum			PQ900078	PQ902094
927_ES_27M_22_Bos_M	Spain	Castille-et-León	Segovie	2022	Bos taurus	Male	H. lusitanicum				PQ902095
928_ES_27M_22_Bos_M	Spain	Castille-et-León	Segovie	2022	Bos taurus	Male	H. lusitanicum			PQ900079
929_ES_27M_22_Bos_M	Spain	Castille-et-León	Segovie	2022	Bos taurus	Male	H. lusitanicum			PQ900080	PQ902096
934_ES_29F_21_Bos_F	Spain	Castille-et-León	Ávila	2021	Bos taurus	Female	H. lusitanicum				PQ902097
1142_MA_1791_23_BOS_F	Morocco	Benslimane	Ziaida	2023	Bos taurus	Female	H. lusitanicum			PQ900081	PQ902098
1143_MA_1792_23_BOS_M	Morocco	Benslimane	Ziaida	2023	Bos taurus	Male	H. lusitanicum				PQ902099
1144_MA_1793_23_BOS_M	Morocco	Benslimane	Ziaida	2023	Bos taurus	Male	H. lusitanicum			PQ900082
1145_MA_1794_23_BOS_M	Morocco	Benslimane	Ziaida	2023	Bos taurus	Male	H. lusitanicum			PQ900083
1146_MA_1795_23_BOS_M	Morocco	Benslimane	Ziaida	2023	Bos taurus	Male	H. lusitanicum			PQ900084
1274_ES_23_23_SUS_A	Spain	Alt Empordà	Peralada i Mollet	2023	Sus scrofa	Adult	H. lusitanicum				PQ902093
1127_DZ_18_18_SUS_F	Algeria	Bouhadjar	Ain El Kerma	2018	Sus scrofa	Female	H. rufipes			PQ899450	PQ897005
905_IT_SCU_12__M	Italy	Sicily	Palermo	2012	Bos taurus	Male	H. scupense			PQ899461	PQ894010
907_IT_SCU_12__M	Italy	Sicily	Palermo	2012	Bos taurus	Male	H. scupense			PQ899462	PQ894011
922_ES_26M_22_Bos_M	Spain	Castille-et-León	Ávila	2022	Bos taurus	Male	H. scupense			PQ899451	PQ894012
923_ES_26M_22_Bos_M	Spain	Castille-et-León	Ávila	2022	Bos taurus	Male	H. scupense			PQ899452	PQ894013
924_ES_26M_22_Bos_M	Spain	Castille-et-León	Ávila	2022	Bos taurus	Male	H. scupense				PQ894014
931_ES_28F_22_Bos_F	Spain	Madrid	Madrid	2022	Bos taurus	Female	H. scupense			PQ899453	PQ894015
932_ES_28F_22_Bos_F	Spain	Madrid	Madrid	2022	Bos taurus	Female	H. scupense			PQ899454	PQ894016
933_ES_28F_22_Bos_F	Spain	Madrid	Madrid	2022	Bos taurus	Female	H. scupense			PQ899455	PQ894017
078_FR13_A17_18_EQU_F	France	Bouches-du-Rhône	Saint-Martin-de-Crau	2018	Equus caballus	Female	H. scupense				OM743219
081_FR34_A02_17_BOS_M	France	Hérault	Saint-Maurice-Navacelles	2017	Bos taurus	Male	H. scupense				OM743220
082_FR34_A02_17_BOS_M	France	Hérault	Saint-Maurice-Navacelles	2017	Bos taurus	Male	H. scupense				OM743221
091_FR34_A02_17_BOS_F	France	Hérault	Saint-Maurice-Navacelles	2017	Bos taurus	Female	H. scupense				OM743222
092_FR34_A02_17_BOS_F	France	Hérault	Saint-Maurice-Navacelles	2017	Bos taurus	Female	H. scupense				OM743223
1326_FR66_1_24_BOS_A	France	Pyrénées-Orientales	Prades	2024	Bos taurus	Adult	H. scupense			PQ899456	PQ894018
1327_FR66_2_24_BOS_A	France	Pyrénées-Orientales	Prades	2024	Bos taurus	Adult	H. scupense			PQ899457	PQ894019
1328_FR66_3_24_BOS_A	France	Pyrénées-Orientales	Prades	2024	Bos taurus	Adult	H. scupense			PQ899458	PQ894020
1329_FR66_4_24_BOS_A	France	Pyrénées-Orientales	Prades	2024	Bos taurus	Adult	H. scupense			PQ899459	PQ894021
1330_FR66_5_24_BOS_A	France	Pyrénées-Orientales	Prades	2024	Bos taurus	Adult	H. scupense				PQ894022
1331_FR66_6_24_BOS_A	France	Pyrénées-Orientales	Prades	2024	Bos taurus	Adult	H. scupense				PQ894023
1332_FR66_7_24_BOS_A	France	Pyrénées-Orientales	Prades	2024	Bos taurus	Adult	H. scupense				PQ894024
1333_FR66_8_24_BOS_A	France	Pyrénées-Orientales	Prades	2024	Bos taurus	Adult	H. scupense				PQ894025
1334_FR66_9_24_BOS_A	France	Pyrénées-Orientales	Prades	2024	Bos taurus	Adult	H. scupense			PQ899460	PQ894026
